# Supplementary material for: Oncolytic Adenoviruses Armed with Tumor Necrosis Factor Alpha and Interleukin-2 Enable Successful Adoptive Cell Therapy
Source: PubMed Central journal article supplement — Mol Ther Oncolytics. 2016 Dec 31;4:77–86. doi: 10.1016/j.omto.2016.12.004 (PMC5363700; doi:10.1016/j.omto.2016.12.004), 2016-12-31
Supplement: mmc1.pdf [file mmc1.pdf]

**OMTO, Volume 4**

## **Supplemental Information**

**Oncolytic Adenoviruses Armed with Tumor**

**Necrosis Factor Alpha and Interleukin-2 Enable**

**Successful Adoptive Cell Therapy**

**Riikka Havunen, Mikko Siurala, Suvi Sorsa, Susanna Grönberg-Vähä-Koskela, Michael Behr, Siri Tähtinen, João Manuel Santos, Pauliina Karell, Juuso Rusanen, Dirk M. Nettelbeck, Anja Ehrhardt, Anna Kanerva, and Akseli Hemminki**

## ORGAN SAMPLE REPORT

|                                                                         |                                  |                                                               |
|-------------------------------------------------------------------------|----------------------------------|---------------------------------------------------------------|
| <b>Species:</b> Mesocricetus auratus                                    | <b>Breed/Strain:</b>             | <b>FCLAP Lab No(s):</b> F11951                                |
| <b>Age:</b> –                                                           | <b>Sex:</b> Male                 | <b>Bodyweight:</b> –                                          |
| <b>Owner/referring scientist:</b> Riikka Havunen                        |                                  | <b>Study Animal No:</b> See below                             |
| <b>Submitted for:</b> Histological examination and immunohistochemistry |                                  |                                                               |
| <b>Study Type and No:</b> Toxicity of different viral treatments        |                                  |                                                               |
| <b>Date treatment started:</b> variable                                 | <b>Date of death:</b> 16.11.2015 | <b>Type of death:</b> 0 - Scheduled Sacrifice                 |
| <b>Billing address:</b>                                                 |                                  | <b>Pathologist(s):</b> Jere Lindén (JKL)<br><b>Typed:</b> JKL |
| <b>Date received:</b>                                                   | <b>Date of Necropsy:</b>         | <b>Date of report:</b> 29.4. 2016 (draft)                     |
| <b>Clinical Features:</b> See below                                     |                                  |                                                               |

### MATERIALS and METHODS

The samples consisted of selected organs, subcutaneous pancreatic tumour implants and lymph nodes of 51 hamsters, which had been treated with various unspecified anticancer viral treatments.

| <b>Animal number</b> | <b>Treatment</b>              | <b>Animal number</b> | <b>Treatment</b>                    |
|----------------------|-------------------------------|----------------------|-------------------------------------|
| A1 – A6              | Control                       | F1, F3, F4, F5, F6   | TIL                                 |
| B1 – B6              | Ad5/3-E2F-d24                 | G2 – G6              | Ad5/3-E2F-d24 + TIL                 |
| C1 – C6              | Ad5/3-E2F-d24-hTNFa           | H2, H3, H5 – H7      | Ad5/3-E2F-d24-hTNFa + TIL           |
| D1, D2, D4, D6       | Ad5/3-E2F-d24-hIL2            | I1, I4, I5, I6       | Ad5/3-E2F-d24-hIL2 + TIL            |
| E2, E3, E7           | Ad5/3-E2F-d24-hTNFa-IRES-hIL2 | J1 – J7              | Ad5/3-E2F-d24-hTNFa-IRES-hIL2 + TIL |

Specifically, organ samples had been taken from **heart** (whole heart), **lung** (one lobe), **liver** (piece of one lobe), **kidney** (side not reported) and **spleen**. For histopathology samples were trimmed, processed routinely into paraffin blocks, cut at 4 µm, and stained with hematoxylin and eosin. Immunohistological analyses of the pancreatic tumour implant and lymph node samples were conducted using antibodies against CD3 (T-cells) and cleaved caspase 3 (apoptosis)

Microscopic findings were classified with standard pathological nomenclature and their severities were graded on a scale of 1 to 4 as minimal, mild, moderate or marked. Grades of severity for microscopic findings were subjective; minimal was the least extent discernible. Microscopic findings that are not usually graded were recorded as present. In case there were no considerable histological findings a phrase “No histological abnormality is recognized (NHAIR)” was used. Semi-quantitative scoring was also applied to T cells (CD3 positive cells) and apoptosis and/or necrosis (caspase-3). Scorings are in brackets and in red.

Density of T cell infiltration in the tumor samples was scored applying grades from 1 (single/isolated) to 4 (dense infiltration among neoplastic cells and/or in inflammatory-type foci) while scoring from 1 to 3 was utilized in the lymph nodes. In lymph nodes grade 1 was used for a sparse population (still dozens to hundreds of cells) of T cells often residing mainly in one compartment and grade 3 for a large

population often representing half (over half) of lymphocytes in the section. Variability was generally modest in the samples.

Caspase-3 positivity appeared to emerge from necrotic areas, single apoptotic or necrotic cells or (globular) cell remnants often in macrophages; in grading I assessed only recognizable single cells (round, nucleus or nuclear remnants present), omitting overt coagulative necroses, necrotic areas and cell debris. Apoptosis was scored from 1 to 3 based on the average number of apoptotic cells (AP) per five 40x objective fields (high power field; HPF): 1, less than 5/HPF; 2, approximately 5/HP; 3, approximately 10/HPF. The average number/HPF is also reported.

## HISTOPATHOLOGY

A detailed description of the microscopic findings in all animals is provided in Appendix 1. In summary, the following changes were observed in the examined organs:

### Heart

Hamsters B2, E2, G3 and H7 exhibited focal acute minimal to mild myodegeneration in septal or ventricular wall. These sporadic alterations were most likely induced by local ischemia.

### Lung

Lung samples of all hamsters displayed varying atelectasis and acute diffuse hyperaemia, often accompanied by scattered alveolar haemorrhages. Animals A1, A2, B1, F3, F4 and I4 showed an increase of heterophils (neutrophils) in the lung capillaries.

### Liver

Typical liver findings were sampling-related acute haemorrhages and tears, and in most animals hepatocytes contained substantial amounts of glycogen.

Animals A5, A6 B2 C2 and I4 exhibited minimal lymphocytic or mixed portal inflammatory cell infiltration, and C3, C6, I6 and J7 a single portal infiltrate. Minimal focal inflammation (sporadic random inflammatory foci consisting of lymphocytes, heterophils, histiocytes and hepatocellular debris) was present in hamster B4. Hamsters F1 and J2 displayed mild, and J3 moderate glycogen depletion.

### Spleen

The spleen samples were generally very small, which impeded their assessment. The most important findings were lymphocyte hyperplasia and increased amount of heterophil aggregates in the red pulp. Lymphocyte hyperplasia, consisting of expansion and rounding of lymphatic areas (white pulp) with increase of medium-sized to large lymphocytes and sometimes lymphoblasts was present in minority of cases. In contrast, loose aggregates of heterophils in red pulp, often near marginal zone, occurred in most animals; only pronounced occurrences are reported. One animal, B5, exhibited mild increase of extramedullary erythroid hematopoiesis in the spleen.

Lymphocyte hyperplasia: minimal B1, B2, B4, B6, C2, C3, E2, J6; mild C6

Increased amount of heterophils in the red pulp: mild A1, B4, C1, E2, F3, G2, H7, I4, I6, J3, J6

### Kidney

Hamsters B5, F3, G3 and I6 exhibited focal (one to several foci) tubular dilatation associated with little epithelial degeneration and necrosis. The dilated tubules contained small amount of proteinaceous content and sometimes casts and single calcifications. In some cases, single neighboring glomeruli demonstrated slight sclerosis. Hamster G5 displayed a large triangular, sharply demarcated cortical lesion that consisted of two types of alterations: Most tubules had small lumen and basophilic low regenerative epithelium, while some exhibited dilatation and epithelial degeneration with few necrotic cells, and contained copious proteinaceous casts and cell debris. Glomeruli were little affected.

These histopathological findings point to incipient hamster glomerulonephropathy with minimal changes in B5, F3 and I6, mild in G3 and mild-moderate in G5.



## COMMENTS

Histological examination was performed on a range of tissues from 51 hamsters, which had been treated with various unspecified anticancer viral treatments.

### Organs

The examined organ samples exhibited various histopathological findings, however, they are most likely (possibly excluding spleen) unrelated to the treatments: In the heart minor, peracute myodegeneration is probably of ischemic origin and might be related to sampling. In the lungs atelectasis is deemed to be a post mortal change, whereas acute hyperaemia and alveolar haemorrhages are considered to be terminal events relating to euthanasia. Mild heterophilic leucostasis in the lung vasculature is also most likely an incidental finding (a common finding in mice). Respectively, in the liver focal minimal to mild inflammation as well as minimal portal inflammatory cell infiltration show no treatment pattern in their emergence and appear thus to be accidental findings [1]. Variation in glycogen content, relative glycogen depletion, is likewise apparently induced by sampling time [1].

Kidney findings in five animals point to incipient (minimal to mild-moderate) hamster glomerulonephropathy [2]. This disease of unknown aetiology and pathogenesis is regarded to be similar to chronic progressive nephropathy (CPN) in rats [2], however, occurring in hamsters more frequently in females than in males; the lesions have thus been graded according to a rat system [3]. In rats some chemicals are known to exacerbate CPN [3], but this appears to be very unlikely in this study.

In the spleen minimal (one mild) lymphocyte hyperplasia appeared to cluster in treatment groups B and C while increased amount of heterophil aggregates in the red pulp seemed to be evenly dispersed among samples. Clustering of the lymphocyte hyperplasia suggests a treatment-related effect, however, the alterations were marginal (and thus possible incidental), and clearly represented a mild reactive response [4,5]. On the other hand, large number of heterophils in the red pulp, especially pronounced in some animals, occurs to be a consistent finding in hamster spleen.

### Tumours and lymph nodes

The tumour samples separated into two distinct categories: 1) Those with epithelioid-like cells (ELCs) resembling inflammatory reaction, generally without discernible neoplastic tissue (inflammatory-type) and 2) aggressive carcinomas with large necrotic areas, sometimes with few ELCs and histiocytic inflammation. The origin of the ELCs remains open; some samples show granulomatous inflammation, which might include true epithelioid cells, while degenerative neoplastic cells cannot be excluded.

Based on HE staining the inflammatory cell infiltration within neoplastic tissue consisted generally of heterophils and lymphocytes with variably intense peripheral infiltrates of similar composition. CD-3 positive T cells appeared to be amply present in all samples, with possibly slightly larger presence in inflammatory-type lesions. In contrast, Caspase-3 positive single apoptotic cells (see Materials and methods) seemed to be more prevalent among carcinomatous tissue, excluding treatment group A, than in inflammatory-type lesions. Notably, these estimates are based on cursory examination of individual animal data.

The lymph node samples formed a heterogeneous population with variable sizes and section planes representing unequally the various lymph node substructures. This heterogeneity appears to mainly explain the apparent variability in T cell density among samples. However, this notion is again based on individual animal data without tabulation of grades.

*Jere Lindén*

29.4.2016

## REFERENCES

1. Maronpot RR, Cullen J, Malarkey DE. (2014). Liver. In: Cesta MF, Herbert RA, Brix A, Malarkey DE, Sills RC (Eds.), *National Toxicology Program Nonneoplastic Lesion Atlas*. Available: <http://ntp.niehs.nih.gov/nnl/hepatobiliary/liver/index.htm> [accessed 20.4.2016]
2. Percy DH, Barthold, SW. Hamster. In: *Pathology of Laboratory Rodents and Rabbits (3rd Ed.)* Oxford: Blackwell Publishing; 2007. pp. 179–216.
3. Khan KNM., Hard GC, Alden CL. Kidney. In: *Haschek and Rousseaux's Handbook of Toxicologic Pathology (3rd Ed.)*. Boston: Elsevier; 2013. pp. 1667–1773.
4. Ward JM, Rehg JE, Morse HC. (2012). Differentiation of rodent immune and hematopoietic system reactive lesions from neoplasias. *Toxicologic Pathology*, 40(3), 425–434.
5. Ramaiah L, Bounous DI, Elmore SA. Hematopoietic System. In: *Haschek and Rousseaux's Handbook of Toxicologic Pathology*. Elsevier; 2013. pp. 1863–1933.

**APPENDIX 1. Individual microscopic data**

| Animal | TISSUE | MICROSCOPIC FINDINGS                                                                                                                                                                                                                                                                                                                                                                                                                                                                                                                                                                                                                                                                                                                                                                                                                                                                                                                                                    |
|--------|--------|-------------------------------------------------------------------------------------------------------------------------------------------------------------------------------------------------------------------------------------------------------------------------------------------------------------------------------------------------------------------------------------------------------------------------------------------------------------------------------------------------------------------------------------------------------------------------------------------------------------------------------------------------------------------------------------------------------------------------------------------------------------------------------------------------------------------------------------------------------------------------------------------------------------------------------------------------------------------------|
| A1     | Heart  | No histological abnormality is recognised (NHAIR).                                                                                                                                                                                                                                                                                                                                                                                                                                                                                                                                                                                                                                                                                                                                                                                                                                                                                                                      |
|        | Lung   | Moderate compression atelectasis; mild acute diffuse hyperaemia. Mild increase of heterophils (neutrophils) in the capillaries.                                                                                                                                                                                                                                                                                                                                                                                                                                                                                                                                                                                                                                                                                                                                                                                                                                         |
|        | Liver  | Large acute haemorrhage (sampling). Hepatocytes contain abundant amounts of glycogen. NHAIR                                                                                                                                                                                                                                                                                                                                                                                                                                                                                                                                                                                                                                                                                                                                                                                                                                                                             |
|        | Spleen | The spleen section is approx.1 mm in diameter. It contains one clearly discernible arteriolar lymphatic sheet area with lymphatic follicle and moderate marginal zone with some macrophages. The red pulp has several loose aggregates of granulocytes.                                                                                                                                                                                                                                                                                                                                                                                                                                                                                                                                                                                                                                                                                                                 |
|        | Kidney | NHAIR                                                                                                                                                                                                                                                                                                                                                                                                                                                                                                                                                                                                                                                                                                                                                                                                                                                                                                                                                                   |
|        | Tumour | Oval mass approx. 1 cm x 5 mm, without natural borders; large (comprises 1/4 of area) central coagulative necrosis (CN), intact tumour tissue in poles of the section. Neoplastic adenocarcinoma cells form disorganized tubular structures in tightly-packed nests with an inconspicuous to (in some areas) moderately fibrotic stroma. The cells are anaplastic with indistinct cell borders and moderate amount of dense basophilic cytoplasm. Nuclei are oval and large, showing anisokaryosis with coarse chromatin and prominent nucleoli as well as high mitotic rate (10/HPF). Central necrosis branches into tumour tissue and some heterophils and lymphocytes reside amongst neoplastic cells. Peripherally, rests a focal thin infiltrate of mononuclear cells<br><u>CD3</u> : Abundant number of T cells among neoplastic cells and in the peripheral infiltrate. [3]<br><u>Casp-3</u> : Approximately 5 AP/HPF (av. 4.8/HPF) in adenocarcinoma areas [2]. |
| A2     | Heart  | NHAIR                                                                                                                                                                                                                                                                                                                                                                                                                                                                                                                                                                                                                                                                                                                                                                                                                                                                                                                                                                   |
|        | Lung   | Marked atelectasis; mild acute diffuse hyperaemia; focal small haemorrhages. Mild increase of heterophils in the capillaries.                                                                                                                                                                                                                                                                                                                                                                                                                                                                                                                                                                                                                                                                                                                                                                                                                                           |
|        | Liver  | Large acute haemorrhage (sampling); mild acute diffuse hyperaemia. NHAIR                                                                                                                                                                                                                                                                                                                                                                                                                                                                                                                                                                                                                                                                                                                                                                                                                                                                                                |
|        | Spleen | Section size approx.1 x 2 mm. NHAIR                                                                                                                                                                                                                                                                                                                                                                                                                                                                                                                                                                                                                                                                                                                                                                                                                                                                                                                                     |
|        | Kidney | NHAIR                                                                                                                                                                                                                                                                                                                                                                                                                                                                                                                                                                                                                                                                                                                                                                                                                                                                                                                                                                   |
|        | LN     | Partial section, size approx. 0,5 mm (two small lymphatic areas amongst lipid, connective tissue and vasculature). Cell-rich; one discernible primary? lymphatic follicle; no foreign cells.<br><u>CD-3</u> : Dense population T cells in one area, probably paracortex, single cells elsewhere [2].                                                                                                                                                                                                                                                                                                                                                                                                                                                                                                                                                                                                                                                                    |
|        | Tumour | Round mass approx. 7 x 6 mm; mostly without natural borders, partly bordered by fibrovascular tissue(dermis). Large ramifying central CN comprises 1/2 of tumor area; adenocarcinoma cells (see A1) in chords/nests among necrosis; some heterophils and lymphocytes reside amongst neoplastic cells. Peripheral fibroblast proliferation with some small infiltrates of mononuclear cells and heterophils.<br><u>CD3</u> : Abundant number of T cells among neoplastic cells and in the peripheral infiltrate. [3]<br><u>Casp-3</u> : Less than 5 AP/HPF (av. 3.8/HPF) in adenocarcinoma areas [1].                                                                                                                                                                                                                                                                                                                                                                    |

|    |        |                                                                                                                                                                                                                                                                                                                                                                                                                                                                                                                                                                                                                                  |
|----|--------|----------------------------------------------------------------------------------------------------------------------------------------------------------------------------------------------------------------------------------------------------------------------------------------------------------------------------------------------------------------------------------------------------------------------------------------------------------------------------------------------------------------------------------------------------------------------------------------------------------------------------------|
| A3 | Heart  | NHAIR                                                                                                                                                                                                                                                                                                                                                                                                                                                                                                                                                                                                                            |
|    | Lung   | Mild to moderate atelectasis; mild acute diffuse hyperaemia. NHAIR                                                                                                                                                                                                                                                                                                                                                                                                                                                                                                                                                               |
|    | Liver  | Some small acute haemorrhages and tears (sampling). NHAIR                                                                                                                                                                                                                                                                                                                                                                                                                                                                                                                                                                        |
|    | Spleen | The section is small and partly broken (approx. 1 x 3 mm). NHAIR                                                                                                                                                                                                                                                                                                                                                                                                                                                                                                                                                                 |
|    | Kidney | NHAIR                                                                                                                                                                                                                                                                                                                                                                                                                                                                                                                                                                                                                            |
|    | LN     | Round section through lymph node, size approx. 1 mm. Cell-rich; Three? lymphatic follicles; no foreign cells.<br><u>CD-3</u> : Dense population of T cells in the centre [3].                                                                                                                                                                                                                                                                                                                                                                                                                                                    |
|    | Tumour | Round mass approx. 6 x 6 mm; mostly without natural borders, small area bordered by dermis. Small ramifying central CN and necrotic foci comprise approx. 1/5 of tumour area; adenocarcinoma cells (see A1) in chords/nests among necrosis and some heterophils and lymphocytes reside amongst neoplastic cells. Peripheral fibroblast proliferation with some small infiltrates of heterophils and mononuclear cells.<br><u>CD3</u> : Modest number T cells among neoplastic cells; in the infiltrate T cells appear to be a minority. [2]<br><u>Casp-3</u> : Approximately 5 AP/HPF (av. 6.4/HPF) in adenocarcinoma areas [2]. |

|    |        |                                                                                                                                                                                                             |
|----|--------|-------------------------------------------------------------------------------------------------------------------------------------------------------------------------------------------------------------|
| A4 | Heart  | NHAIR                                                                                                                                                                                                       |
|    | Lung   | Marked atelectasis; mild acute diffuse hyperaemia. NHAIR                                                                                                                                                    |
|    | Liver  | Some small acute haemorrhages and tears (sampling). NHAIR                                                                                                                                                   |
|    | Spleen | Section size approx. 1,5 x 4 mm. NHAIR                                                                                                                                                                      |
|    | Kidney | NHAIR                                                                                                                                                                                                       |
|    | LN     | Partial oblique section, size approx. 1 mm. Cell-rich; lymphatic follicles poorly discernible; no foreign cells.<br><u>CD-3</u> : Sparse population of T cells outside of one large round central area [2]. |

|    |        |                                                                                                                                                                                                                                                                                                                                                                                                                                                                                                                                                                                                                                  |
|----|--------|----------------------------------------------------------------------------------------------------------------------------------------------------------------------------------------------------------------------------------------------------------------------------------------------------------------------------------------------------------------------------------------------------------------------------------------------------------------------------------------------------------------------------------------------------------------------------------------------------------------------------------|
| A5 | Heart  | NHAIR                                                                                                                                                                                                                                                                                                                                                                                                                                                                                                                                                                                                                            |
|    | Lung   | Mild to moderate atelectasis; mild acute diffuse hyperaemia. NHAIR                                                                                                                                                                                                                                                                                                                                                                                                                                                                                                                                                               |
|    | Liver  | A haemorrhage and a tear (sampling). Some small leucocyte infiltrates in portal areas; mononuclear cells and heterophils. Mixed portal inflammatory cell infiltrates, minimal.                                                                                                                                                                                                                                                                                                                                                                                                                                                   |
|    | Spleen | The section is small and partly broken (approx. 1 x 3 mm). NHAIR                                                                                                                                                                                                                                                                                                                                                                                                                                                                                                                                                                 |
|    | Kidney | NHAIR                                                                                                                                                                                                                                                                                                                                                                                                                                                                                                                                                                                                                            |
|    | LN     | Partial oblique section, size approx. 1 mm. Cell-rich; no lymphatic follicles discernible; no foreign cells.<br><u>CD-3</u> : Dense population of T cells in one part of the section [2].                                                                                                                                                                                                                                                                                                                                                                                                                                        |
|    | Tumour | Elongated mass approx. 7 x 5 mm; mostly bordered by dermis and muscle. Moderately-sized ramifying CN and necrotic foci comprise approx. 1/3 of tumour area; some heterophils and lymphocytes reside amongst adenocarcinoma cells (see A1). There is peripheral fibroblast proliferation and some moderate-sized infiltrates of heterophils and mononuclear cells (some apparent plasma cells) reside in the periphery.<br><u>CD3</u> : Moderate number T cells among neoplastic cells; in the infiltrate T cells appear to be a minority [2].<br><u>Casp-3</u> : Less than 5 AP/HPF (aver. 2.8/HPF) in adenocarcinoma areas [1]. |
|    |        |                                                                                                                                                                                                                                                                                                                                                                                                                                                                                                                                                                                                                                  |



|    |        |                                                                                                                                                                                                                                                                                                                                                                                                                                                                                                                                                                                                     |
|----|--------|-----------------------------------------------------------------------------------------------------------------------------------------------------------------------------------------------------------------------------------------------------------------------------------------------------------------------------------------------------------------------------------------------------------------------------------------------------------------------------------------------------------------------------------------------------------------------------------------------------|
| A6 | Heart  | NHAIR                                                                                                                                                                                                                                                                                                                                                                                                                                                                                                                                                                                               |
|    | Lung   | Marked diffuse atelectasis; mild acute diffuse hyperaemia; focal small haemorrhages. NHAIR                                                                                                                                                                                                                                                                                                                                                                                                                                                                                                          |
|    | Liver  | Some small acute haemorrhages and tears (sampling). Two portal tracts contain a moderate-sized lymphocytic infiltrates. Lymphocytic portal inflammatory cell infiltrates, minimal.                                                                                                                                                                                                                                                                                                                                                                                                                  |
|    | Spleen | Section size approx. 1 x 2 mm. NHAIR                                                                                                                                                                                                                                                                                                                                                                                                                                                                                                                                                                |
|    | Kidney | NHAIR                                                                                                                                                                                                                                                                                                                                                                                                                                                                                                                                                                                               |
|    | LN     | Round section through lymph node, size approx. 1.5 mm.; paracortex medulla?; no foreign cells.<br>CD-3: Dense population of T cells; deep cortical unit and paracortex? [3].                                                                                                                                                                                                                                                                                                                                                                                                                        |
|    | Tumour | Elongated mass approx. 5 x 3 mm; mostly without natural borders. Extensive ramifying CN comprises approx. 4/5 of tumour area and adenocarcinoma cells (see A1) reside in the periphery of the mass in chords/nests. Some heterophils and few lymphocytes are present amongst neoplastic cells, and infiltrates of heterophils and mononuclear cells in the periphery.<br>CD3: Abundant numbers of T cells among neoplastic cells and in the peripheral infiltrate. [3]<br>Casp-3: Little neoplastic tissue present; appr. 5 AP/HPF in (av. 4/HPF, three fields evaluated) adenocarcinoma areas [2]. |

|    |        |                                                                                                                                                                                                                                                                                                                                                                                                                                                                                                                                                                                                                                                                                                                                                                                                                                                                                                                                                                                                                                                                                                                                                               |
|----|--------|---------------------------------------------------------------------------------------------------------------------------------------------------------------------------------------------------------------------------------------------------------------------------------------------------------------------------------------------------------------------------------------------------------------------------------------------------------------------------------------------------------------------------------------------------------------------------------------------------------------------------------------------------------------------------------------------------------------------------------------------------------------------------------------------------------------------------------------------------------------------------------------------------------------------------------------------------------------------------------------------------------------------------------------------------------------------------------------------------------------------------------------------------------------|
| B1 | Heart  | NHAIR                                                                                                                                                                                                                                                                                                                                                                                                                                                                                                                                                                                                                                                                                                                                                                                                                                                                                                                                                                                                                                                                                                                                                         |
|    | Lung   | Moderate to marked diffuse atelectasis; mild acute diffuse hyperaemia. Mild increase of heterophils in the capillaries.                                                                                                                                                                                                                                                                                                                                                                                                                                                                                                                                                                                                                                                                                                                                                                                                                                                                                                                                                                                                                                       |
|    | Liver  | NHAIR                                                                                                                                                                                                                                                                                                                                                                                                                                                                                                                                                                                                                                                                                                                                                                                                                                                                                                                                                                                                                                                                                                                                                         |
|    | Spleen | Section size 1.5 x 3 mm. Lymphatic areas (white pulp) are slightly expanded and rounded with minor increase of medium-sized lymphocytes. Lymphocyte hyperplasia, minimal.                                                                                                                                                                                                                                                                                                                                                                                                                                                                                                                                                                                                                                                                                                                                                                                                                                                                                                                                                                                     |
|    | Kidney | NHAIR                                                                                                                                                                                                                                                                                                                                                                                                                                                                                                                                                                                                                                                                                                                                                                                                                                                                                                                                                                                                                                                                                                                                                         |
|    | LN     | Elongated section through lymph node, size approx. 2 x 1 mm.; some follicles, two secondary? and paracortex; no foreign cells.<br>CD-3: Dense population of T cells; deep cortical unit and paracortex? [3].                                                                                                                                                                                                                                                                                                                                                                                                                                                                                                                                                                                                                                                                                                                                                                                                                                                                                                                                                  |
|    | Tumour | Elongated mass approx. 5 x 3 mm; partly without natural borders, partly bordered by thin fibrous capsule and possibly degenerative muscle. Extensive ramifying CN comprises approx. 3/4 of tumour area, remaining viable adenocarcinoma foci (see A1) residing in the periphery. In part, the CN is bordered by a rim of tightly packed large cells with distinct cell borders, abundant foamy, vacuolar and/or granular cytoplasm, and small bland isomorphic nuclei (epithelioid cells/activated macrophages or degenerative (transformed) neoplastic cells?; epithelioid-like cells, ELCs). Amongst the ELCs are a few multinucleated giant cells with lacy or foamy eosinophilic cytoplasm (MGC) some of which contain bluish-gray lucent material. Single heterophils and lymphocytes are present amongst neoplastic cells, and moderate-sized infiltrates of mainly lymphocytes (some apparent plasma cells) reside in the periphery.<br>CD3: Abundant numbers of T cells among neoplastic cells and in the peripheral infiltrate. [3]<br>Casp-3: Little neoplastic tissue present; less than 5 AP/HPF (av. 2/HPF) in adenocarcinoma and ELC areas [1]. |

|    |        |                                                                                                                                                                                                                                                                                                                                                                                                                                                                                                                                                                                                |
|----|--------|------------------------------------------------------------------------------------------------------------------------------------------------------------------------------------------------------------------------------------------------------------------------------------------------------------------------------------------------------------------------------------------------------------------------------------------------------------------------------------------------------------------------------------------------------------------------------------------------|
| B2 | Heart  | A focal eosinophilic area of myodegeneration in the septum.                                                                                                                                                                                                                                                                                                                                                                                                                                                                                                                                    |
|    | Lung   | Moderate to marked diffuse atelectasis; moderate acute diffuse hyperaemia; focal small haemorrhages. NHAIR                                                                                                                                                                                                                                                                                                                                                                                                                                                                                     |
|    | Liver  | One portal tract contains two moderate-sized lymphocytic infiltrates. (generally small lymphocytes). Lymphocytic portal inflammatory cell infiltrates, minimal.                                                                                                                                                                                                                                                                                                                                                                                                                                |
|    | Spleen | Section size approx. 2 x 3 mm (triangular). Lymphatic areas (white pulp) are slightly expanded and rounded with minor increase of medium-sized to large lymphocytes and some lymphoblasts. Lymphocyte hyperplasia, minimal.                                                                                                                                                                                                                                                                                                                                                                    |
|    | Kidney | NHAIR                                                                                                                                                                                                                                                                                                                                                                                                                                                                                                                                                                                          |
|    | LN     | Elongated section through lymph node, size approx. 2 x 1 mm.; mainly paracortex?, no definite follicles; no foreign cells.<br><u>CD-3</u> : Dense population of T cells focally, generally sparse population [2].                                                                                                                                                                                                                                                                                                                                                                              |
|    | Tumour | Triangular mass, approx. 4 x 3 mm; partly bordered by fibrovascular tissue. Large ramifying CN comprises approx. 1/2 of tumour area and adenocarcinoma cells reside in the periphery. Few heterophils and lymphocytes are present amongst neoplastic cells; modest infiltrates of mononuclear cells and heterophils cells in the periphery.<br><u>CD3</u> : Abundant numbers of T cells among neoplastic cells and in the peripheral infiltrate. [3]<br><u>Casp-3</u> : Little neoplastic tissue present; less than 5 AP/HPF (av. 3.5/HPF, four fields evaluated) in adenocarcinoma areas [1]. |

|    |        |                                                                                                                                                                                                                                                                                                                                                                                                                                                                                                                                                                                                                                                                                                                               |
|----|--------|-------------------------------------------------------------------------------------------------------------------------------------------------------------------------------------------------------------------------------------------------------------------------------------------------------------------------------------------------------------------------------------------------------------------------------------------------------------------------------------------------------------------------------------------------------------------------------------------------------------------------------------------------------------------------------------------------------------------------------|
| B3 | Heart  | NHAIR                                                                                                                                                                                                                                                                                                                                                                                                                                                                                                                                                                                                                                                                                                                         |
|    | Lung   | Moderate diffuse atelectasis; moderate acute diffuse hyperaemia; focal small haemorrhages. NHAIR                                                                                                                                                                                                                                                                                                                                                                                                                                                                                                                                                                                                                              |
|    | Liver  | NHAIR                                                                                                                                                                                                                                                                                                                                                                                                                                                                                                                                                                                                                                                                                                                         |
|    | Spleen | Section size approx. 1 x 2 mm. NHAIR.                                                                                                                                                                                                                                                                                                                                                                                                                                                                                                                                                                                                                                                                                         |
|    | Kidney | NHAIR                                                                                                                                                                                                                                                                                                                                                                                                                                                                                                                                                                                                                                                                                                                         |
|    | LN     | Elongated section through lymph node, size approx. 2 x 1 mm.; mainly paracortex?, one primary follicle?; no foreign cells.<br><u>CD-3</u> : Dense population of T cells in a DCU? [3].                                                                                                                                                                                                                                                                                                                                                                                                                                                                                                                                        |
|    | Tumour | Oval mass, approx. 8 x 5 mm; partly bordered by fibrovascular, lipid and muscle tissues. Moderately-sized ramifying CN and necrotic foci comprise approx. 1/4 of tumour area; viable neoplastic areas show typical adenocarcinoma cells and contain some heterophils and few lymphocytes. There is strong peripheral fibroblast proliferation and large infiltrates of lymphocytes and plasma cells, partly in the bordering tissues. Some apparent plasma cells) reside in the periphery.<br><u>CD3</u> : Abundant numbers of T cells among neoplastic cells; in the infiltrates T cells are a minority (10%?), but abundantly present. [3]<br><u>Casp-3</u> : Appr. 10 AP/HPF (aver. 11.4/HPF) in adenocarcinoma areas [3]. |

|    |        |                                                                                                                                                                                                                                                                     |
|----|--------|---------------------------------------------------------------------------------------------------------------------------------------------------------------------------------------------------------------------------------------------------------------------|
| B4 | Heart  | NHAIR                                                                                                                                                                                                                                                               |
|    | Lung   | Moderate diffuse atelectasis; moderate acute diffuse hyperaemia; focal small haemorrhages. NHAIR                                                                                                                                                                    |
|    | Liver  | Slight acute diffuse hyperaemia. Sporadic random inflammatory foci consisting of lymphocytes, heterophils, histiocytes and hepatocellular debris. Minimal focal inflammation.                                                                                       |
|    | Spleen | Section size approx. 1,5 x 4 mm. Lymphatic areas (white pulp) are slightly expanded and rounded with minor increase of medium-sized to large lymphocytes. Lymphocyte hyperplasia, minimal. The red pulp contains mildly increased amounts of heterophil aggregates. |
|    | Kidney | NHAIR                                                                                                                                                                                                                                                               |

|    |        |                                                                                                                                                                                                                                                                                                                                                                                                                                                                                                                                                                                                                                                                                                                                                                   |
|----|--------|-------------------------------------------------------------------------------------------------------------------------------------------------------------------------------------------------------------------------------------------------------------------------------------------------------------------------------------------------------------------------------------------------------------------------------------------------------------------------------------------------------------------------------------------------------------------------------------------------------------------------------------------------------------------------------------------------------------------------------------------------------------------|
| B5 | Heart  | NHAIR                                                                                                                                                                                                                                                                                                                                                                                                                                                                                                                                                                                                                                                                                                                                                             |
|    | Lung   | Moderate to marked diffuse atelectasis; moderate acute diffuse hyperaemia; focal small haemorrhages. NHAIR                                                                                                                                                                                                                                                                                                                                                                                                                                                                                                                                                                                                                                                        |
|    | Liver  | One small inflammatory foci surrounded by degenerated hepatocytes and consisting of lymphocytes and single macrophages. NHAIR                                                                                                                                                                                                                                                                                                                                                                                                                                                                                                                                                                                                                                     |
|    | Spleen | Section size approx. 1.5 x 3 mm. Mildly increased extramedullary erythroid haematopoiesis.                                                                                                                                                                                                                                                                                                                                                                                                                                                                                                                                                                                                                                                                        |
|    | Kidney | Superficial cortex contains three foci (convoluted tubule segments of single nephrons?) of tubular dilatation associated with minimal epithelial degeneration and necrosis.                                                                                                                                                                                                                                                                                                                                                                                                                                                                                                                                                                                       |
|    | LN     | Elongated size approx. 3 x 2 mm., lacerated; mainly lymphatic tissue, two secondary follicles; no foreign cells.<br><u>CD-3</u> : Dense population of T cells in paracortex/cortex? [3].                                                                                                                                                                                                                                                                                                                                                                                                                                                                                                                                                                          |
|    | Tumour | Elongated mass, approx. 8 x 5 mm and a round 2 mm satellite nodule; both partly bordered by fibrovascular tissue and muscle. In the mass large ramifying CN comprises approx. 1/2 of tumour area and adenocarcinoma cells reside in the periphery; nodule consists of adenocarcinoma with small necrotic foci. Some heterophils and few lymphocytes are present amongst neoplastic cells; modest infiltrates of mononuclear cells and heterophils (more heterophils in the large mass) in the periphery and moderate peripheral fibroblast proliferation in the mass.<br><u>CD3</u> : Abundant numbers of T cells among neoplastic cells and in the peripheral infiltrate. [3]<br><u>Casp-3</u> : Approximately 5 AP/HPF (av. 6/HPF) in adenocarcinoma areas [2]. |

|    |        |                                                                                                                                                                                                                                                                                                                                                                                                                                                                                                                                                                                                                                                                   |
|----|--------|-------------------------------------------------------------------------------------------------------------------------------------------------------------------------------------------------------------------------------------------------------------------------------------------------------------------------------------------------------------------------------------------------------------------------------------------------------------------------------------------------------------------------------------------------------------------------------------------------------------------------------------------------------------------|
| B6 | Heart  | NHAIR                                                                                                                                                                                                                                                                                                                                                                                                                                                                                                                                                                                                                                                             |
|    | Lung   | Moderate diffuse atelectasis with areas of marked diffuse atelectasis; moderate acute diffuse hyperaemia. NHAIR                                                                                                                                                                                                                                                                                                                                                                                                                                                                                                                                                   |
|    | Liver  | Focal small superficial haemorrhages. NHAIR                                                                                                                                                                                                                                                                                                                                                                                                                                                                                                                                                                                                                       |
|    | Spleen | Section size approx. 1 x 4 mm. Lymphocyte hyperplasia, minimal. (see B4).                                                                                                                                                                                                                                                                                                                                                                                                                                                                                                                                                                                         |
|    | Kidney | NHAIR                                                                                                                                                                                                                                                                                                                                                                                                                                                                                                                                                                                                                                                             |
|    | LN     | Round section through lymph node, size approx. 1 mm.; cell dense, mainly paracortex?, three follicles?; no foreign cells.<br><u>CD-3</u> : Dense population of T cells in a DCU/paracortex? [3].                                                                                                                                                                                                                                                                                                                                                                                                                                                                  |
|    | Tumour | Elongated mass approx. 4 x 3 mm; partly without natural borders, partly bordered by thin fibrous capsule. Extensive ramifying CN comprises approx. 2/3 of tumour area, remaining viable adenocarcinoma residing in the periphery. Large number of heterophils and some lymphocytes are present amongst neoplastic cells, and large infiltrates of mainly lymphocytes (some apparent plasma cells) and some heterophils reside in the periphery.<br><u>CD3</u> : Moderate number T cells among neoplastic cells and in the infiltrate. [2]<br><u>Casp-3</u> : Little neoplastic tissue present. Aproximately 5 AP/HPF (aver. 6.2/HPF) in adenocarcinoma areas [2]. |

|    |        |                                                                                                                                                                                                                                                                                                                                                                                                                                                                                                                                                                                  |
|----|--------|----------------------------------------------------------------------------------------------------------------------------------------------------------------------------------------------------------------------------------------------------------------------------------------------------------------------------------------------------------------------------------------------------------------------------------------------------------------------------------------------------------------------------------------------------------------------------------|
| C1 | Heart  | NHAIR                                                                                                                                                                                                                                                                                                                                                                                                                                                                                                                                                                            |
|    | Lung   | Moderate diffuse atelectasis; moderate acute diffuse hyperaemia. NHAIR                                                                                                                                                                                                                                                                                                                                                                                                                                                                                                           |
|    | Liver  | Focal small superficial haemorrhages. One inflammatory focus consisting of heterophils, histiocytes, lymphocytes and hepatocellular debris. NHAIR                                                                                                                                                                                                                                                                                                                                                                                                                                |
|    | Spleen | Section size approx. 1 x 3 mm. Mildly increased number of loose granulocyte aggregates in the red pulp.                                                                                                                                                                                                                                                                                                                                                                                                                                                                          |
|    | Kidney | NHAIR                                                                                                                                                                                                                                                                                                                                                                                                                                                                                                                                                                            |
|    | LN     | Elongated size approx. 3 x 2 mm; cortex, paracortex and medulla; no foreign cells.<br><u>CD-3</u> : Dense population of T cells [3].                                                                                                                                                                                                                                                                                                                                                                                                                                             |
|    | Tumour | Round mass, approx. 3 mm; without natural borders. Moderate-sized CN comprises approx. 1/3 of tumour area, remaining viable adenocarcinoma flanks the CN and contains several small necrotic foci. Some heterophils and lymphocytes are present amongst neoplastic cells, but there are very infiltrates of mainly lymphocytes (some apparent plasma cells) and some heterophils reside in the periphery.<br><u>CD3</u> : Moderate number T cells among neoplastic cells and in the infiltrate. [2]<br><u>Casp-3</u> : Appr.10 AP/HPF (av. 9.8/HPF) in adenocarcinoma areas [3]. |

|    |        |                                                                                                                                                                                                       |
|----|--------|-------------------------------------------------------------------------------------------------------------------------------------------------------------------------------------------------------|
| C2 | Heart  | NHAIR                                                                                                                                                                                                 |
|    | Lung   | Moderate diffuse atelectasis; moderate acute diffuse hyperaemia. NHAIR                                                                                                                                |
|    | Liver  | Focal small superficial haemorrhages. One large portal lymphocytic infiltrate. Lymphocytic portal inflammatory cell infiltrates, minimal.                                                             |
|    | Spleen | Section size approx. 1.5 x 3 mm. One coalescing area of white pulp that is slightly expanded and rounded with increased number of medium-sized to large lymphocytes. Lymphocyte hyperplasia, minimal. |
|    | Kidney | NHAIR                                                                                                                                                                                                 |
|    | LN     | Round section through lymph node, size approx. 2 mm.; cell dense, mainly paracortex and cortex?, some follicles?; no foreign cells.<br><u>CD-3</u> : Very sparse population of T cells [1].           |

|    |        |                                                                                                                                                                                                                |
|----|--------|----------------------------------------------------------------------------------------------------------------------------------------------------------------------------------------------------------------|
| C3 | Heart  | NHAIR                                                                                                                                                                                                          |
|    | Lung   | Moderate, focally mild, atelectasis; moderate acute diffuse hyperaemia. NHAIR                                                                                                                                  |
|    | Liver  | Focal small superficial haemorrhages and tears. One medium-sized portal lymphocytic infiltrate. NHAIR                                                                                                          |
|    | Spleen | Section size approx. 1 x 3 mm. Lymphatic areas (white pulp) are mildly expanded and rounded with some increase of medium-sized to large lymphocytes. Lymphocyte hyperplasia, mild.                             |
|    | Kidney | NHAIR                                                                                                                                                                                                          |
|    | LN     | Elongated section, size approx. 2 x 1 mm; cortex +paracortex, hilus in the middle?, activated: four secondary follicles; no foreign cells.<br><u>CD-3</u> : Sparse population of T cells mainly in cortex [1]. |

|    |        |                                                                                                                                                                                          |
|----|--------|------------------------------------------------------------------------------------------------------------------------------------------------------------------------------------------|
| C4 | Heart  | NHAIR                                                                                                                                                                                    |
|    | Lung   | Moderate to marked atelectasis; moderate acute diffuse hyperaemia. NHAIR                                                                                                                 |
|    | Liver  | Focal small superficial haemorrhages. NHAIR                                                                                                                                              |
|    | Spleen | Section size approx. 1 x 5 mm. NHAIR                                                                                                                                                     |
|    | Kidney | NHAIR                                                                                                                                                                                    |
|    | LN     | Round section, size approx. 2 mm; cortex, paracortex and medulla?, activated: 4-5 secondary follicles; no foreign cells.<br><u>CD-3</u> : T cells in cortex and in paracortex (DCU) [2]. |

|    |        |                                                                                                                                                                                      |
|----|--------|--------------------------------------------------------------------------------------------------------------------------------------------------------------------------------------|
| C5 | Heart  | NHAIR                                                                                                                                                                                |
|    | Lung   | Marked atelectasis; moderate acute diffuse hyperaemia; multifocal small alveolar haemorrhages. NHAIR                                                                                 |
|    | Liver  | Focal haemorrhages and tears. NHAIR                                                                                                                                                  |
|    | Spleen | Section size approx. 1 x 3 mm. NHAIR                                                                                                                                                 |
|    | Kidney | NHAIR                                                                                                                                                                                |
|    | LN     | Elongated section, size approx. 3 x 2 mm; cortex, paracortex and medulla?, activated: 3 secondary follicles; no foreign cells.<br><u>CD-3</u> : Sparse T cells mainly in cortex [2]. |

|    |        |                                                                                                                                                                                                                                                                                                                                                                                                                                                                                                                                                                         |
|----|--------|-------------------------------------------------------------------------------------------------------------------------------------------------------------------------------------------------------------------------------------------------------------------------------------------------------------------------------------------------------------------------------------------------------------------------------------------------------------------------------------------------------------------------------------------------------------------------|
| C6 | Heart  | NHAIR                                                                                                                                                                                                                                                                                                                                                                                                                                                                                                                                                                   |
|    | Lung   | Marked atelectasis; moderate acute diffuse hyperaemia. NHAIR                                                                                                                                                                                                                                                                                                                                                                                                                                                                                                            |
|    | Liver  | Focal haemorrhages and tears. One medium-sized portal lymphocytic infiltrate. NHAIR                                                                                                                                                                                                                                                                                                                                                                                                                                                                                     |
|    | Spleen | Section size approx. 1 x 6 mm. Lymphatic areas (white pulp) are mildly expanded and with some increase of medium-sized to large lymphocytes. Lymphocyte hyperplasia, mild.                                                                                                                                                                                                                                                                                                                                                                                              |
|    | Kidney | NHAIR                                                                                                                                                                                                                                                                                                                                                                                                                                                                                                                                                                   |
|    | LN     | Round section, size < 1 mm partly crushed; paracortex, one follicle?; no foreign cells.<br><u>CD-3</u> : Sparse T cells in paracortex? [2].                                                                                                                                                                                                                                                                                                                                                                                                                             |
|    | Tumour | Size approx. 3 x 2 mm, triangular. Mass consists of epidermis, dermis subcutis and muscle. Subcutaneous-dermal vaguely bordered fibrous tissue without clear adenocarcinoma cells; small aggregates of ELCs and some single MGCs, generally with calcifications. Some loose infiltrates of lymphocytes, plasma cells and few heterophils.<br><u>CD-3</u> : Moderate amounts of disseminated individual T cells and small aggregates; abundant amount of T cells in ELC aggregates. [3]<br><u>Casp-3</u> : Less than 5 AP/HPF (aver. 1.6/HPF) in whole section area [1]. |

|    |        |                                                                                                                                                        |
|----|--------|--------------------------------------------------------------------------------------------------------------------------------------------------------|
| D1 | Heart  | NHAIR                                                                                                                                                  |
|    | Lung   | Moderate diffuse atelectasis; moderate acute diffuse hyperaemia. NHAIR                                                                                 |
|    | Liver  | Focal small superficial haemorrhages. One small portal infiltrate consisting of single lymphocytes and heterophils. NHAIR                              |
|    | Spleen | Section size approx. 1 x 3 mm. Shrunken white pulp.                                                                                                    |
|    | Kidney | NHAIR                                                                                                                                                  |
|    | LN     | Elongated section, size approx. 2 x 1 mm; cortex, paracortex?, poorly discernible follicles; no foreign cells.<br><u>CD-3</u> : T cells diffusely [3]. |

|    |        |                                                                                                                    |
|----|--------|--------------------------------------------------------------------------------------------------------------------|
| D2 | Heart  | NHAIR                                                                                                              |
|    | Lung   | Moderate diffuse atelectasis; moderate acute diffuse hyperaemia. NHAIR                                             |
|    | Liver  | Focal small superficial haemorrhages. One small portal infiltrate consisting of lymphocytes and macrophages. NHAIR |
|    | Spleen | Section size approx. 1 x 2 mm. NHAIR                                                                               |
|    | Kidney | NHAIR                                                                                                              |

|    |        |                                                                                                                                                                                               |
|----|--------|-----------------------------------------------------------------------------------------------------------------------------------------------------------------------------------------------|
| D4 | Heart  | NHAIR                                                                                                                                                                                         |
|    | Lung   | Moderate atelectasis; moderate acute diffuse hyperaemia; focal small haemorrhages. NHAIR                                                                                                      |
|    | Liver  | A focal haemorrhage and a tear. NHAIR                                                                                                                                                         |
|    | Spleen | Section size approx. 1 x 5 mm. NHAIR                                                                                                                                                          |
|    | Kidney | NHAIR                                                                                                                                                                                         |
|    | LN     | Elongated section, size approx. 3 x 2 mm; cortex +paracortex, hilus in the middle?, poorly discernible follicles; no foreign cells.<br><u>CD-3</u> : T cells in cortex and in paracortex [2]. |

|    |        |                                                                                                                                                                                                                                                                                                                                                                                                                                                                                                                                                                                                      |
|----|--------|------------------------------------------------------------------------------------------------------------------------------------------------------------------------------------------------------------------------------------------------------------------------------------------------------------------------------------------------------------------------------------------------------------------------------------------------------------------------------------------------------------------------------------------------------------------------------------------------------|
| D6 | Heart  | Missing                                                                                                                                                                                                                                                                                                                                                                                                                                                                                                                                                                                              |
|    | Lung   | Moderate atelectasis; moderate acute diffuse hyperaemia. NHAIR                                                                                                                                                                                                                                                                                                                                                                                                                                                                                                                                       |
|    | Liver  | Focal small superficial haemorrhages. NHAIR                                                                                                                                                                                                                                                                                                                                                                                                                                                                                                                                                          |
|    | Spleen | Section size approx. 1 x 4 mm. Lymphocyte hyperplasia, minimal. (See B2)                                                                                                                                                                                                                                                                                                                                                                                                                                                                                                                             |
|    | Kidney | NHAIR                                                                                                                                                                                                                                                                                                                                                                                                                                                                                                                                                                                                |
|    | LN     | Size approx. 1 x 2 mm; superficial cortex and little paracortex; cell-rich, no secondary lymphatic follicles; no foreign cells.<br><u>CD-3</u> : Some reactivity in paracortex and isolated cells in parafollicular cortex [2].                                                                                                                                                                                                                                                                                                                                                                      |
|    | Tumour | Size approx. 2 x 2 mm. Partly without natural borders, partly bordered by fibrous tissue containing some degenerative muscle fibres. Reactive tissue? without clear adenocarcinoma cells, main cell type tightly packed ELCs admixed with degenerative heterophils; isolated macropahage-type cells contain yellowish brown granular pigment (hemosiderin); one small peripheral calcified focus with possibble MGCs.<br><u>CD-3</u> : Large amount of individual T cells and dense T cell aggregates [4].<br><u>Casp-3</u> : Less than 5 AP/HPF (av. 1.5/HPF, four areas counted) in ELC areas [1]. |

|    |        |                                                                                                                                                                                                                                                              |
|----|--------|--------------------------------------------------------------------------------------------------------------------------------------------------------------------------------------------------------------------------------------------------------------|
| E2 | Heart  | A focal eosinophilic area of acute myodegeneration in the septum.                                                                                                                                                                                            |
|    | Lung   | Moderate atelectasis; moderate acute diffuse hyperaemia. NHAIR                                                                                                                                                                                               |
|    | Liver  | A focal haemorrhage and tear. NHAIR                                                                                                                                                                                                                          |
|    | Spleen | Section size approx. 1 x 1.5 mm. The white pulp is slightly expanded and rounded with increased number of medium-sized to large lymphocytes. Lymphocyte hyperplasia, minimal. Mildly increased numbers of heterophils in loose infiltrates in marginal zone. |
|    | Kidney | NHAIR                                                                                                                                                                                                                                                        |
|    | LN     | Size approx. 1 x 2 mm; cortex and paracortex?; cell-rich, no clear follicles; no foreign cells.<br><u>CD-3</u> : Little reactivity, mainly in cortex [2].                                                                                                    |

|    |        |                                                                                                                                                                                                                                                                                                                                                                                                                                                                                                                                                   |
|----|--------|---------------------------------------------------------------------------------------------------------------------------------------------------------------------------------------------------------------------------------------------------------------------------------------------------------------------------------------------------------------------------------------------------------------------------------------------------------------------------------------------------------------------------------------------------|
| E2 | Tumour | Oval mass, approx. 6 x 4 mm; without natural borders. Large CN comprises approx. 2/3 of tumour area, remaining viable adenocarcinoma flanks the CN and shows abundant fibroplasia. Some heterophils and lymphocytes are present amongst neoplastic cells and in the periphery appears a focal thin infiltrate of heterophils and lymphocytes (some apparent plasma cells).<br><u>CD3</u> : Moderate number T cells among neoplastic cells and in the infiltrate. [2]<br><u>Casp-3</u> : Appr. 5 AP/HPF (aver. 7/HPF) in adenocarcinoma areas [3]. |
|----|--------|---------------------------------------------------------------------------------------------------------------------------------------------------------------------------------------------------------------------------------------------------------------------------------------------------------------------------------------------------------------------------------------------------------------------------------------------------------------------------------------------------------------------------------------------------|

|    |        |                                                                                                                                                                                                                                                                                                                                                                                                                                                                                                                                                    |
|----|--------|----------------------------------------------------------------------------------------------------------------------------------------------------------------------------------------------------------------------------------------------------------------------------------------------------------------------------------------------------------------------------------------------------------------------------------------------------------------------------------------------------------------------------------------------------|
| E3 | Heart  | NHAIR                                                                                                                                                                                                                                                                                                                                                                                                                                                                                                                                              |
|    | Lung   | Marked atelectasis; moderate acute diffuse hyperaemia. A small subpleural focal infiltrate of heterophils and macrophages surrounded by small haemorrhage. Focal subpleural acute inflammation.                                                                                                                                                                                                                                                                                                                                                    |
|    | Liver  | A focal haemorrhage and tear. NHAIR                                                                                                                                                                                                                                                                                                                                                                                                                                                                                                                |
|    | Spleen | Section size approx. 1 x 3 mm. NHAIR                                                                                                                                                                                                                                                                                                                                                                                                                                                                                                               |
|    | Kidney | NHAIR                                                                                                                                                                                                                                                                                                                                                                                                                                                                                                                                              |
|    | LN     | Round, approx. 1 mm; cortex and paracortex?; cell-rich, some primary follicles; no foreign cells.<br><u>CD-3</u> : Dense population of T cells in the paracortex (DCUs?) [3].                                                                                                                                                                                                                                                                                                                                                                      |
|    | Tumour | A shred of tissue, approx. 1 mm. Fibrous tissue containing some partly calcified necrotic foci, MGCs as well as brown granular pigment (hemosiderin?) and few small lakes of bluish lucent (foreign?) material without cellular reaction; some small infiltrates of lymphocytes and macrophages and individual lymphocytes in the periphery.<br><u>CD-3</u> : Moderate amounts of disseminated individual T cells and small aggregates [2].<br><u>Casp-3</u> : Less than 5 AP/HPF (aver. 1/HPF, three evaluated fields) outside necrotic foci [1]. |

|    |        |                                                                                                                                                                                                                                                                                                                                                                                                                                                                                                                                                                                                                           |
|----|--------|---------------------------------------------------------------------------------------------------------------------------------------------------------------------------------------------------------------------------------------------------------------------------------------------------------------------------------------------------------------------------------------------------------------------------------------------------------------------------------------------------------------------------------------------------------------------------------------------------------------------------|
| E7 | Heart  | NHAIR                                                                                                                                                                                                                                                                                                                                                                                                                                                                                                                                                                                                                     |
|    | Lung   | Marked to moderate atelectasis; moderate acute diffuse hyperaemia; focal small haemorrhages. NHAIR                                                                                                                                                                                                                                                                                                                                                                                                                                                                                                                        |
|    | Liver  | A focal haemorrhage and a tear. NHAIR                                                                                                                                                                                                                                                                                                                                                                                                                                                                                                                                                                                     |
|    | Spleen | Section size approx. 1 x 1 mm. The section contains no white pulp. Mildly increased numbers of heterophils in loose infiltrates in marginal zone.                                                                                                                                                                                                                                                                                                                                                                                                                                                                         |
|    | Kidney | NHAIR                                                                                                                                                                                                                                                                                                                                                                                                                                                                                                                                                                                                                     |
|    | LN     | Round, approx. 1 mm; cortex and paracortex?; cell-rich, 2 secondary follicles; no foreign cells.<br><u>CD-3</u> : Modest number of T cells in cortex [2].                                                                                                                                                                                                                                                                                                                                                                                                                                                                 |
|    | Tumour | Elongated mass, approx. 3 x 2 mm. In fibrous tissue resides an oval (1-2 mm) focus consisting of homogenous eosinophilic material (degenerative collagen), bordered and infiltrated by ELCs as well as some macrophages and lymphocytes. The encircling fibrous tissue contains small infiltrates of lymphocytes and macrophages (few heterophils) and individual lymphocytes; some macrophages contain brown granular pigment (hemosiderin?).<br><u>CD-3</u> : Moderate amounts of disseminated individual T cells and small aggregates [2].<br><u>Casp-3</u> : Less than 5 AP/HPF (aver. 1.2/HPF) in whole section [1]. |



|    |        |                                                                                                                                                                                                                                                                                                                                                                                                                                                                                                                        |
|----|--------|------------------------------------------------------------------------------------------------------------------------------------------------------------------------------------------------------------------------------------------------------------------------------------------------------------------------------------------------------------------------------------------------------------------------------------------------------------------------------------------------------------------------|
| F1 | Heart  | NHAIR                                                                                                                                                                                                                                                                                                                                                                                                                                                                                                                  |
|    | Lung   | Moderate to marked atelectasis; moderate acute diffuse hyperaemia; focal alveolar haemorrhages. NHAIR                                                                                                                                                                                                                                                                                                                                                                                                                  |
|    | Liver  | Mild glycogen depletion.                                                                                                                                                                                                                                                                                                                                                                                                                                                                                               |
|    | Spleen | Two sections, both approx. 1 x 2 mm. NHAIR                                                                                                                                                                                                                                                                                                                                                                                                                                                                             |
|    | Kidney | NHAIR                                                                                                                                                                                                                                                                                                                                                                                                                                                                                                                  |
|    | LN     | Size approx. 1 x 2 mm, perinodal fat and lymphoid tissue; cortex paracortex and medulla?; cell-rich, one secondary follicle; no foreign cells.<br>CD-3: Moderate reactivity, mainly in cortex [2].                                                                                                                                                                                                                                                                                                                     |
|    | Tumour | Ragged piece of tissue, approx. 3 x 2 mm. Fibrous and fibrovascular tissue and lipid. Some aggregates of foamy ELCs with small lymphocytic infiltrates; peripherally an aggregate of MGCs, lymphocytes and macrophages; small aggregates of lymphocytes and macrophages (some with brown pigment; hemosiderin?); individual lymphocytes / loose infiltrates amply present.<br>CD-3: Ample amount of individual T cells [3].<br>Casp-3: Less than 5 AP/HPF (aver. 2.8/HPF, four evaluated fields) in whole section [1]. |

|    |        |                                                                                                                                                                                                                                                                                                                                                                                                                                                                                                                                                                                                                           |
|----|--------|---------------------------------------------------------------------------------------------------------------------------------------------------------------------------------------------------------------------------------------------------------------------------------------------------------------------------------------------------------------------------------------------------------------------------------------------------------------------------------------------------------------------------------------------------------------------------------------------------------------------------|
| F3 | Heart  | NHAIR                                                                                                                                                                                                                                                                                                                                                                                                                                                                                                                                                                                                                     |
|    | Lung   | Marked atelectasis; moderate acute diffuse hyperaemia. Mild increase of heterophils in the capillaries.                                                                                                                                                                                                                                                                                                                                                                                                                                                                                                                   |
|    | Liver  | NHAIR                                                                                                                                                                                                                                                                                                                                                                                                                                                                                                                                                                                                                     |
|    | Spleen | Section size approx. 1 x 2 mm. Mildly increased numbers of heterophils in loose infiltrates in marginal zone.                                                                                                                                                                                                                                                                                                                                                                                                                                                                                                             |
|    | Kidney | Superficial cortex contains one focus (convoluted tubule segment of a single nephron?) of tubule dilatation with proteinaceous content and minimal epithelial degeneration and necrosis accompanied by a degenerative glomerulus with slight sklerosis.                                                                                                                                                                                                                                                                                                                                                                   |
|    | LN     | Elongated section 1 x 2 mm. Cell-rich, paracortex and cortex?; poorly-discernible follicles; no foreign cells.<br>CD-3: Moderate reactivity, mainly in paracortex [3].                                                                                                                                                                                                                                                                                                                                                                                                                                                    |
|    | Tumour | Round mass, approx. 8 mm. Mostly without natural borders (a short stretch of fibrous capsule); extensive CN comprises approx. 4/5 of tumour area. Remaining viable adenocarcinoma flanks the CN on one side, showing many small necrotic foci and peripheral moderate fibroplasia. Some lymphocytes are present amongst neoplastic cells; few small infiltrates of heterophils and lymphocytes in outer border of viable tumour and in the fibrous capsule.<br>CD-3: Ample amount of disseminated individual T cells and small aggregates [3].<br>Casp-3: Approximately 5 AP/HPF (av. 4/HPF) in adenocarcinoma areas [2]. |

|    |        |                                                                                                                                                                                             |
|----|--------|---------------------------------------------------------------------------------------------------------------------------------------------------------------------------------------------|
| F4 | Heart  | NHAIR                                                                                                                                                                                       |
|    | Lung   | Moderate atelectasis; moderate acute diffuse hyperaemia; mild increase of heterophils in the capillaries.                                                                                   |
|    | Liver  | Focal haemorrhages and a tear. NHAIR                                                                                                                                                        |
|    | Spleen | Section size approx. 1-2 x 8 mm. Moderately increased numbers of heterophils in loose infiltrates in marginal zones and scattered in the red pulp.                                          |
|    | Kidney | NHAIR                                                                                                                                                                                       |
|    | LN     | Partial section of a lymph node, approx. 1 mm. Cell-rich, paracortex and medulla?; no discernible follicles; no foreign cells.<br>CD-3: Diffuse reactivity, dense reactivity in a DCU? [3]. |



|    |        |                                                                                                                                                                                                                                                                                                                                                                                                                                                                                                                                                                                                                                                                                         |
|----|--------|-----------------------------------------------------------------------------------------------------------------------------------------------------------------------------------------------------------------------------------------------------------------------------------------------------------------------------------------------------------------------------------------------------------------------------------------------------------------------------------------------------------------------------------------------------------------------------------------------------------------------------------------------------------------------------------------|
| F4 | Tumour | <p>Triangular section, approx. 6 x 4 mm. Mostly without natural borders, partly bordered by fibrovascular tissue and muscle; CN comprises approx. 1/3 of tumour area. Remaining viable adenocarcinoma flanks the CN on one side, showing many small necrotic foci and moderate fibroplasia. Some lymphocytes are present amongst neoplastic cells and copious infiltrates of heterophils, lymphocytes and plasma cells are present in fibrotic areas and peripherally in tumour borders.</p> <p><u>CD-3</u>: Ample amount of disseminated individual T cells and T cells in small aggregates [3].</p> <p><u>Casp-3</u>: Appr. 5 AP/HPF (aver. 7.4/HPF) in adenocarcinoma areas [2].</p> |
|----|--------|-----------------------------------------------------------------------------------------------------------------------------------------------------------------------------------------------------------------------------------------------------------------------------------------------------------------------------------------------------------------------------------------------------------------------------------------------------------------------------------------------------------------------------------------------------------------------------------------------------------------------------------------------------------------------------------------|

|    |        |                                                                          |
|----|--------|--------------------------------------------------------------------------|
| F5 | Heart  | NHAIR                                                                    |
|    | Lung   | Moderate to marked atelectasis; moderate acute diffuse hyperaemia. NHAIR |
|    | Liver  | A haemorrhage and a tear. NHAIR                                          |
|    | Spleen | Two sections: approx. 1 x 2 mm. NHAIR                                    |
|    | Kidney | NHAIR                                                                    |

|    |        |                                                                                                                                                                                                                                                                                                                                                                                                                                                                                                                                                                                                                                                                                                 |
|----|--------|-------------------------------------------------------------------------------------------------------------------------------------------------------------------------------------------------------------------------------------------------------------------------------------------------------------------------------------------------------------------------------------------------------------------------------------------------------------------------------------------------------------------------------------------------------------------------------------------------------------------------------------------------------------------------------------------------|
| F6 | Heart  | NHAIR                                                                                                                                                                                                                                                                                                                                                                                                                                                                                                                                                                                                                                                                                           |
|    | Lung   | Moderate atelectasis; moderate acute diffuse hyperaemia. NHAIR                                                                                                                                                                                                                                                                                                                                                                                                                                                                                                                                                                                                                                  |
|    | Liver  | Focal small superficial haemorrhages. NHAIR                                                                                                                                                                                                                                                                                                                                                                                                                                                                                                                                                                                                                                                     |
|    | Spleen | Section size approx. 1 x 6 mm. NHAIR                                                                                                                                                                                                                                                                                                                                                                                                                                                                                                                                                                                                                                                            |
|    | Kidney | NHAIR                                                                                                                                                                                                                                                                                                                                                                                                                                                                                                                                                                                                                                                                                           |
|    | Tumour | <p>Round section, approx. 4 mm. Bordered by fibrovascular tissue, muscle or fibrous capsule; Central CN (and a cavity) comprises approx. 2/3 of tumour area. Remaining viable adenocarcinoma surrounds the CN as a thin rim and shows some peripheral fibroplasia. Some lymphocytes are present amongst neoplastic cells and copious infiltrates of heterophils, lymphocytes and plasma cells are circling the tumour borders.</p> <p><u>CD-3</u>: Ample amount of disseminated individual T cells amongst neoplastic cells and in small aggregates in peripheral infiltrates [3].</p> <p><u>Casp-3</u>: Appr.5 AP/HPF (aver. 6.25/HPF, four fields evaluated) in adenocarcinoma areas [1].</p> |

|    |        |                                                                                                                                                                                                          |
|----|--------|----------------------------------------------------------------------------------------------------------------------------------------------------------------------------------------------------------|
| G2 | Heart  | NHAIR                                                                                                                                                                                                    |
|    | Lung   | Moderate to marked atelectasis; moderate acute diffuse hyperaemia. NHAIR                                                                                                                                 |
|    | Liver  | Focal tears and haemorrhages. NHAIR                                                                                                                                                                      |
|    | Spleen | Section size approx. 1 x 4 mm. Mildly increased numbers of heterophils in loose infiltrates in marginal zone.                                                                                            |
|    | Kidney | NHAIR                                                                                                                                                                                                    |
|    | LN     | <p>Bean-shaped section of a lymph node, approx. 2 x 1 mm. Cell-rich, all parts present; two secondary follicles?; no foreign cells.</p> <p><u>CD-3</u>: Dense reactivity in paracortex (a DCU?) [3].</p> |

|    |        |                                                                                                                                                                                                                                                                                                                                                                                                                                                                                                                                                                                                                                                                                         |
|----|--------|-----------------------------------------------------------------------------------------------------------------------------------------------------------------------------------------------------------------------------------------------------------------------------------------------------------------------------------------------------------------------------------------------------------------------------------------------------------------------------------------------------------------------------------------------------------------------------------------------------------------------------------------------------------------------------------------|
| G2 | Tumour | <p>Elongated, torn section, approx. 8 x 4 mm. Without natural borders. Extensive CN comprises approx. 4/5 of tumour area. Remaining viable adenocarcinoma flanks the CN on one side, showing many small necrotic foci and some focal fibroplasia. Some lymphocytes are present amongst neoplastic cells, and small infiltrates of heterophils, lymphocytes and plasma cells in the periphery; a focal loose aggregate of ELCs with single calcifications.</p> <p><u>CD-3</u>: Moderate amount of disseminated individual T cells amongst neoplastic cells and in peripheral infiltrates [2].</p> <p><u>Casp-3</u>: Less than 5 AP/ HPF (aver. 2.6/HPF) in adenocarcinoma areas [1].</p> |
|----|--------|-----------------------------------------------------------------------------------------------------------------------------------------------------------------------------------------------------------------------------------------------------------------------------------------------------------------------------------------------------------------------------------------------------------------------------------------------------------------------------------------------------------------------------------------------------------------------------------------------------------------------------------------------------------------------------------------|

|    |        |                                                                                                                                                                                                                                                                                                                                                                                                                                                                                                                                                                                                                                                                                                                                                                                                                                                                                                    |
|----|--------|----------------------------------------------------------------------------------------------------------------------------------------------------------------------------------------------------------------------------------------------------------------------------------------------------------------------------------------------------------------------------------------------------------------------------------------------------------------------------------------------------------------------------------------------------------------------------------------------------------------------------------------------------------------------------------------------------------------------------------------------------------------------------------------------------------------------------------------------------------------------------------------------------|
| G3 | Heart  | Few eosinophilic degenerated myofibers in the left ventricle wall.                                                                                                                                                                                                                                                                                                                                                                                                                                                                                                                                                                                                                                                                                                                                                                                                                                 |
|    | Lung   | Moderate to marked atelectasis; moderate acute diffuse hyperaemia. NHAIR                                                                                                                                                                                                                                                                                                                                                                                                                                                                                                                                                                                                                                                                                                                                                                                                                           |
|    | Liver  | One small portal infiltrate consisting of macrophages, lymphocytes and single heterophils. NHAIR                                                                                                                                                                                                                                                                                                                                                                                                                                                                                                                                                                                                                                                                                                                                                                                                   |
|    | Spleen | Section size approx. 1 x 2 mm. NHAIR                                                                                                                                                                                                                                                                                                                                                                                                                                                                                                                                                                                                                                                                                                                                                                                                                                                               |
|    | Kidney | Cortex contains a few foci of tubular dilatation with epithelial degeneration (and necrosis) or basophilic low regenerative epithelium. Some dilated cortical tubuli and medullary tubular segments contain eosinophilic proteinaceous casts (single calcifications). Few neighbouring glomeruli exhibit slight sclerosis.                                                                                                                                                                                                                                                                                                                                                                                                                                                                                                                                                                         |
|    | LN     | Size approx. 0,3 mm (three small lymphatic areas amongst lipid, connective tissue and vasculature). Cell-rich; no lymphatic follicles no foreign cells.<br><u>CD-3</u> :Dense positivity in two areas, probably paracortex [3].                                                                                                                                                                                                                                                                                                                                                                                                                                                                                                                                                                                                                                                                    |
|    | Tumour | <p>Triangular, torn section, approx. 3 mm. Mostly without natural borders, in part bordered by fibrovascular tissue. Large CN and degenerative collagen? comprise approx. 3/4 of tumour area. Remaining viable adenocarcinoma cells form a thin rim on one side and show degenerative changes, small necrotic foci and apoptosis; aggregates of ELCs side the neoplastic cells and there is a peripheral large calcified focus with some MGCs. Large number of heterophils and some lymphocytes are present amongst neoplastic cells; dense infiltrates of heterophils, lymphocytes and plasma cells encircle and invade neoplastic, ELC and calcified areas.</p> <p><u>CD-3</u>: Abundant amount of disseminated individual T cells amongst neoplastic cells and in peripheral infiltrates [3].</p> <p><u>Casp-3</u>: Less than 5 AP/HPF (aver. 1.8/HPF) in adenocarcinoma and ELC areas [1].</p> |

|    |        |                                                                                                                                                                                                                                   |
|----|--------|-----------------------------------------------------------------------------------------------------------------------------------------------------------------------------------------------------------------------------------|
| G4 | Heart  | NHAIR                                                                                                                                                                                                                             |
|    | Lung   | Mild to moderate atelectasis; moderate acute diffuse hyperaemia. NHAIR                                                                                                                                                            |
|    | Liver  | A focal tear and haemorrhage. One medium-sized portal lymphocytic infiltrate with some macrophages. NHAIR                                                                                                                         |
|    | Spleen | Section size approx. 1 x 6 mm. NHAIR                                                                                                                                                                                              |
|    | Kidney | NHAIR                                                                                                                                                                                                                             |
|    | LN     | <p>Size approx. 0,5 mm, three small lymphatic areas (one crushed) amongst lipid, connective tissue and vasculature. Cell-rich; no lymphatic follicles no foreign cells.</p> <p><u>CD-3</u>: Sparse population of T cells [2].</p> |

|    |        |                                                                                                                                                                                                                                                                                                                                                                                                                                                            |
|----|--------|------------------------------------------------------------------------------------------------------------------------------------------------------------------------------------------------------------------------------------------------------------------------------------------------------------------------------------------------------------------------------------------------------------------------------------------------------------|
| G5 | Heart  | NHAIR                                                                                                                                                                                                                                                                                                                                                                                                                                                      |
|    | Lung   | Moderate to marked atelectasis; moderate acute diffuse hyperaemia. NHAIR                                                                                                                                                                                                                                                                                                                                                                                   |
|    | Liver  | A haemorrhage and a tear. NHAIR                                                                                                                                                                                                                                                                                                                                                                                                                            |
|    | Spleen | Two sections: approx. 1 x 2 mm. NHAIR                                                                                                                                                                                                                                                                                                                                                                                                                      |
|    | Kidney | Kidney cortex contains an elongated (2–3 mm) triangular sharply demarcated lesion area with sunken surface. The area consists of densely packed tortuous tubules of two types: Some tubuli are dilated, contain eosinophilic (proteinaceous) casts and/or cell debris and show epithelial degeneration with few necrotic cells. The other type of tubules have small lumen and basophilic low regenerative epithelium. Glomeruli are not markedly altered. |
|    | LN     | Elongated section, approx. 2 x 1 mm. Cell-rich; little cortex present no discernible lymphatic follicles; no foreign cells.<br>CD-3: Sparse population of T cells [2].                                                                                                                                                                                                                                                                                     |

|    |        |                                                                                                                                                                                                                                                                                                                                                                                                                                                                                                                                                                                                                                                                                                                                                                                                                           |
|----|--------|---------------------------------------------------------------------------------------------------------------------------------------------------------------------------------------------------------------------------------------------------------------------------------------------------------------------------------------------------------------------------------------------------------------------------------------------------------------------------------------------------------------------------------------------------------------------------------------------------------------------------------------------------------------------------------------------------------------------------------------------------------------------------------------------------------------------------|
| G6 | Heart  | NHAIR                                                                                                                                                                                                                                                                                                                                                                                                                                                                                                                                                                                                                                                                                                                                                                                                                     |
|    | Lung   | Moderate atelectasis; moderate acute diffuse hyperaemia. NHAIR                                                                                                                                                                                                                                                                                                                                                                                                                                                                                                                                                                                                                                                                                                                                                            |
|    | Liver  | Focal small superficial haemorrhages. NHAIR                                                                                                                                                                                                                                                                                                                                                                                                                                                                                                                                                                                                                                                                                                                                                                               |
|    | Spleen | Section size approx. 1 x 6 mm. NHAIR                                                                                                                                                                                                                                                                                                                                                                                                                                                                                                                                                                                                                                                                                                                                                                                      |
|    | Kidney | NHAIR                                                                                                                                                                                                                                                                                                                                                                                                                                                                                                                                                                                                                                                                                                                                                                                                                     |
|    | LN     | Elongated section, approx. 3 x 2 mm. Cell-rich, all parts present; five secondary follicles (activated); no foreign cells.<br>CD-3: Dense reactivity in paracortex (2 DCUs?) [3].                                                                                                                                                                                                                                                                                                                                                                                                                                                                                                                                                                                                                                         |
|    | Tumour | Elongated section, approx. 6 x 4 mm. Bordered by fibrovascular tissue and fibrous capsule. Large ramifying central CN comprises approx. 3/4 of tumour area. Remaining viable adenocarcinoma cells form a thin cap on one side and show small necrotic foci and apoptosis; small aggregates of ELCs side the neoplastic cells and on opposite side exist some MCGs and small calcifications. Some heterophils and lymphocytes are present amongst neoplastic cells; dense infiltrates of heterophils, lymphocytes and plasma cells encircle (in fibrous outer tissue) and invade the neoplastic, ELC and MCG areas.<br>CD-3: Abundant amount of disseminated individual T cells amongst neoplastic cells and in peripheral infiltrates [3].<br>Casp-3: Approximately 5 AP/HPF (aver. 4.2/HPF) in adenocarcinoma areas [2]. |

|    |        |                                                                                                                                                    |
|----|--------|----------------------------------------------------------------------------------------------------------------------------------------------------|
| H2 | Heart  | NHAIR                                                                                                                                              |
|    | Lung   | Moderate to marked atelectasis; moderate acute diffuse hyperaemia; focal alveolar haemorrhages. NHAIR                                              |
|    | Liver  | NHAIR                                                                                                                                              |
|    | Spleen | Section size approx. 1 x 1.5 mm. NHAIR. Hypoplasia?                                                                                                |
|    | Kidney | NHAIR                                                                                                                                              |
|    | LN     | Round approx. 1 mm. Cell-rich; no lymphatic follicles cortex absent?; no foreign cells.<br>CD-3: Even, moderately dense population of T cells [2]. |

|    |        |                                                                |
|----|--------|----------------------------------------------------------------|
| H3 | Heart  | NHAIR                                                          |
|    | Lung   | Moderate atelectasis; moderate acute diffuse hyperaemia. NHAIR |
|    | Liver  | A haemorrhage and a tear. NHAIR                                |
|    | Spleen | Section size approx. 1 x 7 mm. NHAIR                           |
|    | Kidney | NHAIR                                                          |

|    |        |                                                                                                                                                                                        |
|----|--------|----------------------------------------------------------------------------------------------------------------------------------------------------------------------------------------|
| H5 | Heart  | NHAIR                                                                                                                                                                                  |
|    | Lung   | Mild atelectasis; moderate acute diffuse hyperaemia. NHAIR                                                                                                                             |
|    | Liver  | A focal tear and haemorrhage. NHAIR                                                                                                                                                    |
|    | Spleen | Section size approx. 2 x 3 mm (triangular). NHAIR                                                                                                                                      |
|    | Kidney | NHAIR                                                                                                                                                                                  |
|    | LN     | Bean-shaped section of a lymph node, approx. 2 x 1 mm. Cell-rich, all parts present; 2-3 primary follicles?; no foreign cells.<br>CD-3: Sparse population of T cells below cortex [2]. |

|    |        |                                                                          |
|----|--------|--------------------------------------------------------------------------|
| H6 | Heart  | NHAIR                                                                    |
|    | Lung   | Moderate to marked atelectasis; moderate acute diffuse hyperaemia. NHAIR |
|    | Liver  | A haemorrhage and a tear. One small portal lymphocytic infiltrate. NHAIR |
|    | Spleen | Section size approx. 1 x 2 mm (triangular); flaked section. NHAIR        |
|    | Kidney | NHAIR                                                                    |

|    |        |                                                                                                                                                                                                                                                                                                                                                                                                                                                                                                                                                                                                                                                                                                                                                  |
|----|--------|--------------------------------------------------------------------------------------------------------------------------------------------------------------------------------------------------------------------------------------------------------------------------------------------------------------------------------------------------------------------------------------------------------------------------------------------------------------------------------------------------------------------------------------------------------------------------------------------------------------------------------------------------------------------------------------------------------------------------------------------------|
| H7 | Heart  | Two eosinophilic foci of myodegeneration in the septum.                                                                                                                                                                                                                                                                                                                                                                                                                                                                                                                                                                                                                                                                                          |
|    | Lung   | Moderate atelectasis; moderate acute diffuse hyperaemia. NHAIR                                                                                                                                                                                                                                                                                                                                                                                                                                                                                                                                                                                                                                                                                   |
|    | Liver  | A haemorrhage and a tear. NHAIR                                                                                                                                                                                                                                                                                                                                                                                                                                                                                                                                                                                                                                                                                                                  |
|    | Spleen | Section size approx. 2 x 3 mm); partly broken. Mildly increased numbers of heterophils in loose aggregates in the red pulp.                                                                                                                                                                                                                                                                                                                                                                                                                                                                                                                                                                                                                      |
|    | Kidney | NHAIR                                                                                                                                                                                                                                                                                                                                                                                                                                                                                                                                                                                                                                                                                                                                            |
|    | LN     | Bean-shaped section, approx. 2 x 1 mm. Cell-rich, medulla, paracortex, one follicle? no foreign cells.<br>CD-3: Sparse population of T cells below cortex [2].                                                                                                                                                                                                                                                                                                                                                                                                                                                                                                                                                                                   |
|    | Tumour | Round section, approx. 6 mm. Mostly without natural borders; short segment of lipid tissue. Extensive ramifying CN comprises over 4/5 of tumour area. Remaining viable adenocarcinoma cells form a thin cap on one side and small islands on the CN, and show small necrotic foci and apoptosis. Large number of heterophils and some lymphocytes are present amongst neoplastic cells; some small but dense infiltrates of heterophils, lymphocytes and plasma cells flank and invade neoplastic cells.<br>CD-3: Abundant amount of disseminated individual T cells amongst neoplastic cells and in peripheral infiltrates [3].<br>Casp-3: Little viable tissue; appr. 5 AP/HPF (av. 5.5/HPF, four fields counted) in adenocarcinoma areas [2]. |

|    |        |                                                                          |
|----|--------|--------------------------------------------------------------------------|
| I1 | Heart  | NHAIR                                                                    |
|    | Lung   | Moderate to marked atelectasis; moderate acute diffuse hyperaemia. NHAIR |
|    | Liver  | A haemorrhage and a tear. NHAIR                                          |
|    | Spleen | Section size approx. 1 x 7 mm. Lymphocyte hyperplasia, minimal.          |

|    |        |                                                                                                                                                                                                                                                                                                                                                                                                                                                                                        |
|----|--------|----------------------------------------------------------------------------------------------------------------------------------------------------------------------------------------------------------------------------------------------------------------------------------------------------------------------------------------------------------------------------------------------------------------------------------------------------------------------------------------|
| 11 | Kidney | NHAIR                                                                                                                                                                                                                                                                                                                                                                                                                                                                                  |
|    | LN     | Elongated section, approx. 2 x 1 mm. Cell-rich, cortex, paracortex, 2-3 large secondary follicles; no foreign cells.<br><u>CD-3</u> : Sparse population of T cells in interfollicular cortex and below cortex [2].                                                                                                                                                                                                                                                                     |
|    | Tumour | Elongated piece of tissue, approx. 3 x 1 mm. Muscle in one end, other parts without natural borders; fibrous tissue. Some aggregates of foamy ELCs with small lymphocytic infiltrates and areas of MGCs and calcifications; individual lymphocytes / loose lymphocyte infiltrates amply present.<br><u>CD-3</u> : Moderate amount of T cells individually and in loose aggregates [2].<br><u>Casp-3</u> : Little tissue; less than 5 AP/HPF (aver. 0.75/HPF, four fields counted) [1]. |

|    |        |                                                                                                                                                                                       |
|----|--------|---------------------------------------------------------------------------------------------------------------------------------------------------------------------------------------|
| 14 | Heart  | NHAIR                                                                                                                                                                                 |
|    | Lung   | Marked atelectasis; moderate acute diffuse hyperaemia; mild increase of heterophils in the capillaries.                                                                               |
|    | Liver  | A haemorrhage and a tear. One large portal (spreading periportally) lymphocytic infiltrate. Lymphocytic portal inflammatory cell infiltrates, minimal.                                |
|    | Spleen | Section size approx. 1 x 2 mm. Mildly increased numbers of heterophils in the red pulp and in marginal zones.                                                                         |
|    | Kidney | NHAIR                                                                                                                                                                                 |
|    | LN     | Round section, approx. 3 mm. Cell-rich, cortex, paracortex, four secondary follicles; no foreign cells.<br><u>CD-3</u> : Sparse population of T cells in cortex and below cortex [2]. |

|    |        |                                                                                                                                                                                                                          |
|----|--------|--------------------------------------------------------------------------------------------------------------------------------------------------------------------------------------------------------------------------|
| 15 | Heart  | NHAIR                                                                                                                                                                                                                    |
|    | Lung   | Marked atelectasis; moderate acute diffuse hyperaemia. NHAIR                                                                                                                                                             |
|    | Liver  | A haemorrhage and a tear. NHAIR                                                                                                                                                                                          |
|    | Spleen | Section size approx. 1 x 7 mm. Lymphocyte hyperplasia, minimal.                                                                                                                                                          |
|    | Kidney | NHAIR                                                                                                                                                                                                                    |
|    | LN     | Elongated, partial section of lymphnode, approx. 3 x 1 mm. Cell-rich, cortex, paracortex, four secondary follicles; no foreign cells.<br><u>CD-3</u> : Abundant number of T cells in cortex and below cortex (DCU?) [3]. |

|    |        |                                                                                                                                                                                                                                                                 |
|----|--------|-----------------------------------------------------------------------------------------------------------------------------------------------------------------------------------------------------------------------------------------------------------------|
| 16 | Heart  | NHAIR                                                                                                                                                                                                                                                           |
|    | Lung   | Moderate to marked atelectasis; moderate acute diffuse hyperaemia. NHAIR                                                                                                                                                                                        |
|    | Liver  | One medium-sized portal lymphocytic infiltrate with some macrophages. NHAIR                                                                                                                                                                                     |
|    | Spleen | Section size approx. 1 x 2 mm. Mildly increased numbers of heterophils in the red pulp and in marginal zones.                                                                                                                                                   |
|    | Kidney | Superficial cortex contains one focus (convoluted tubule segment of a single nephron?) of tubule dilatation with little proteinaceous content and minimal epithelial degeneration and necrosis accompanied by a glomerulus with slight mesangial proliferation. |
|    | LN     | Elongated, partial section of lymphnode, approx. 3 x 1 mm; some crushing. Cell-rich, mainly paracortex; no foreign cells.<br><u>CD-3</u> : Very sparse T cell reactivity [1].                                                                                   |

|    |        |                                                                                                                                                                                                                                                                                                                                                                                                                                                                                                                                                                                                                                |
|----|--------|--------------------------------------------------------------------------------------------------------------------------------------------------------------------------------------------------------------------------------------------------------------------------------------------------------------------------------------------------------------------------------------------------------------------------------------------------------------------------------------------------------------------------------------------------------------------------------------------------------------------------------|
| J1 | Heart  | NHAIR                                                                                                                                                                                                                                                                                                                                                                                                                                                                                                                                                                                                                          |
|    | Lung   | Moderate to marked atelectasis; moderate acute diffuse hyperaemia. NHAIR                                                                                                                                                                                                                                                                                                                                                                                                                                                                                                                                                       |
|    | Liver  | A haemorrhage and a tear. NHAIR                                                                                                                                                                                                                                                                                                                                                                                                                                                                                                                                                                                                |
|    | Spleen | Section size approx. 1 x 7 mm. NHAIR                                                                                                                                                                                                                                                                                                                                                                                                                                                                                                                                                                                           |
|    | Kidney | NHAIR                                                                                                                                                                                                                                                                                                                                                                                                                                                                                                                                                                                                                          |
|    | LN     | Elongated section, approx. 2 x 1 mm, two partial sections of lymphocytes. Cell-rich, paracortex, medulla?, poorly discernible cortex; no foreign cells. <u>CD-3</u> : Dense population of T cells in paracortex (a DCU? and below cortex [3].                                                                                                                                                                                                                                                                                                                                                                                  |
|    | Tumour | Round section, approx. 3 mm. Muscle in one end, other parts without natural borders; fibrous tissue. Large aggregates/infiltrates of foamy ELCs with abundant lymphocyte infiltration; admixed with MGCs and calcifications (and some lucent bluish-gray material); large number of individual lymphocytes and plasma cells / loose lymphocyte infiltrates and macrophages. <u>CD-3</u> : Large number of T cells individually and in loose aggregates especially among ELC aggregates [3].<br><u>Casp-3</u> : Heterogeneous, more in lymphocyte-rich areas; approximately AP/HPF (aver. 6.2/HPF) in adenocarcinoma areas [2]. |

|    |        |                                                                                                                                                                                                                                                                                                                                                                                                                                                                                                                                                                  |
|----|--------|------------------------------------------------------------------------------------------------------------------------------------------------------------------------------------------------------------------------------------------------------------------------------------------------------------------------------------------------------------------------------------------------------------------------------------------------------------------------------------------------------------------------------------------------------------------|
| J2 | Heart  | NHAIR                                                                                                                                                                                                                                                                                                                                                                                                                                                                                                                                                            |
|    | Lung   | Moderate atelectasis; moderate acute diffuse hyperaemia; focal alveolar haemorrhages. NHAIR                                                                                                                                                                                                                                                                                                                                                                                                                                                                      |
|    | Liver  | Centrolobular hepatocytes contain small amount of glycogen and none is present in periportal hepatocytes. Concurrently, in one part of the section periportal cells hold modest amounts of yellow-green pigment. Similar pigment is also present in Kupffer cells. Mild glycogen depletion                                                                                                                                                                                                                                                                       |
|    | Spleen | Section size approx. 1 x 2 mm (triangular). NHAIR                                                                                                                                                                                                                                                                                                                                                                                                                                                                                                                |
|    | Kidney | NHAIR                                                                                                                                                                                                                                                                                                                                                                                                                                                                                                                                                            |
|    | LN     | Elongated, partial section of lymphnode, approx. 3 x 1 mm. Cell-rich, cortex, paracortex, three secondary follicles; no foreign cells. <u>CD-3</u> : Abundant number of T cells in cortex and below cortex (DCU?) [3].                                                                                                                                                                                                                                                                                                                                           |
|    | Tumour | Elongated section, approx. 3 x 2 mm. Bordered by muscle and fibrous tissue or fibrovascular tissue. Round (2 mm) tumour filled with aggregates of MGCs and abundant calcifications (and some lucent bluish-gray material); admixed with aggregates/infiltrates of foamy ELCs; throughout sample large number of individual lymphocytes and plasma cells / loose lymphocyte infiltrates and macrophages. <u>CD-3</u> : Large number of T cells especially among MGC and ELC aggregates [3].<br><u>Casp-3</u> : Less than 5 AP/HPF (aver. 2.8/HPF) among ELCs [1]. |

|    |        |                                                                                                                                                                                                                |
|----|--------|----------------------------------------------------------------------------------------------------------------------------------------------------------------------------------------------------------------|
| J3 | Heart  | NHAIR                                                                                                                                                                                                          |
|    | Lung   | Marked atelectasis; moderate acute diffuse hyperaemia; focal alveolar haemorrhages. NHAIR                                                                                                                      |
|    | Liver  | A haemorrhage and a tear. Centrolobular hepatocytes contain small amount of glycogen and very little is present in periportal hepatocytes. Glycogen depletion, moderate.                                       |
|    | Spleen | Section size approx. 1 x 7 mm. Mildly increased numbers of heterophils in marginal zones.                                                                                                                      |
|    | Kidney | NHAIR                                                                                                                                                                                                          |
|    | LN     | T-shaped, partial section of lymphnode, approx. 3 x 1 mm. Paracortex, and medulla, cortex poorly discernible; no foreign cells. <u>CD-3</u> : T cells in paracortex (DCUs?) and in cortex, few in medulla [2]. |

|    |        |                                                                                                                                                                                                                                                                                                                                                                                                                                                                                                                                                                                                                                                                                                                |
|----|--------|----------------------------------------------------------------------------------------------------------------------------------------------------------------------------------------------------------------------------------------------------------------------------------------------------------------------------------------------------------------------------------------------------------------------------------------------------------------------------------------------------------------------------------------------------------------------------------------------------------------------------------------------------------------------------------------------------------------|
| J3 | Tumour | <p>Elongated section, approx. 3 x 2 mm. Bordered by muscle and fibrovascular tissue or fibrous capsule. Oval tumour filled with aggregates of MGCs and abundant calcifications (and some lucent bluish-gray material); admixed with aggregates/infiltrates of foamy ELCs; throughout sample large number of individual lymphocytes and plasma cells / loose lymphocyte infiltrates and macrophages; peripherally large infiltrates of heterophils, lymphocytes and plasma cells.</p> <p><u>CD-3</u>: Large number of T cells especially among MGC and ELC aggregates (Peripheral infiltrates contain relatively few T cells) [3].</p> <p><u>Casp-3</u>: Less than 5 AP/HPF (aver. 1.4/HPF) among ELCs [1].</p> |
|----|--------|----------------------------------------------------------------------------------------------------------------------------------------------------------------------------------------------------------------------------------------------------------------------------------------------------------------------------------------------------------------------------------------------------------------------------------------------------------------------------------------------------------------------------------------------------------------------------------------------------------------------------------------------------------------------------------------------------------------|

|    |        |                                                                                                                                                                                                                                                                                                                                                                                                                                                                                                                                                 |
|----|--------|-------------------------------------------------------------------------------------------------------------------------------------------------------------------------------------------------------------------------------------------------------------------------------------------------------------------------------------------------------------------------------------------------------------------------------------------------------------------------------------------------------------------------------------------------|
| J4 | Heart  | NHAIR                                                                                                                                                                                                                                                                                                                                                                                                                                                                                                                                           |
|    | Lung   | Moderate to marked atelectasis; moderate acute diffuse hyperaemia. NHAIR                                                                                                                                                                                                                                                                                                                                                                                                                                                                        |
|    | Liver  | A haemorrhage and a tear. Cytoplasmic hyaline inclusions. NHAIR                                                                                                                                                                                                                                                                                                                                                                                                                                                                                 |
|    | Spleen | Section size approx. 1 x 2 mm. NHAIR                                                                                                                                                                                                                                                                                                                                                                                                                                                                                                            |
|    | Kidney | NHAIR                                                                                                                                                                                                                                                                                                                                                                                                                                                                                                                                           |
|    | LN     | <p>Bean-shaped section of a lymph node, approx. 2 x 1 mm. Cell-rich, all parts present; 2-3 secondary follicles?; no foreign cells.</p> <p><u>CD-3</u>: Sparse population of T cells below cortex in cortex [1].</p>                                                                                                                                                                                                                                                                                                                            |
|    | Tumour | <p>Triangular section, approx. 2 mm. Without natural borders. Apex of triangle consists of fibrous tissue; in base a mixture of calcified areas and aggregates/infiltrates of foamy ELCs; some MGCs (some with lucent bluish-gray material); abundant number of individual lymphocytes and plasma cells / loose lymphocyte infiltrates and macrophages.</p> <p><u>CD-3</u>: Large number of T cells especially among ELC aggregates and around calcified foci [3].</p> <p><u>Casp-3</u>: Less than 5 AP/HPF (aver. 1.6/HPF) among ELCs [1].</p> |

|    |        |                                                                                                                                                                                                                                                                                                                                                                                                                                                                                                                                                             |
|----|--------|-------------------------------------------------------------------------------------------------------------------------------------------------------------------------------------------------------------------------------------------------------------------------------------------------------------------------------------------------------------------------------------------------------------------------------------------------------------------------------------------------------------------------------------------------------------|
| J5 | Heart  | NHAIR                                                                                                                                                                                                                                                                                                                                                                                                                                                                                                                                                       |
|    | Lung   | Moderate atelectasis; moderate acute diffuse hyperaemia. NHAIR                                                                                                                                                                                                                                                                                                                                                                                                                                                                                              |
|    | Liver  | NHAIR                                                                                                                                                                                                                                                                                                                                                                                                                                                                                                                                                       |
|    | Spleen | Section size approx. 2 x 5 mm. NHAIR                                                                                                                                                                                                                                                                                                                                                                                                                                                                                                                        |
|    | Kidney | NHAIR                                                                                                                                                                                                                                                                                                                                                                                                                                                                                                                                                       |
|    | LN     | <p>Round section, approx. 2 mm. Cell-rich, cortex, paracortex, one secondary follicle; no foreign cells.</p> <p><u>CD-3</u>: Dense population of T cells in below cortex (a DCU?) [3].</p>                                                                                                                                                                                                                                                                                                                                                                  |
|    | Tumour | <p>Oval section, approx. 2 x 1 mm. Bordered by fibrovascular tissue (with nerve fibres or fibrous capsule). Large calcified areas and several MGCs, some with lucent bluish-gray material or bright yellow granules; small number of foamy ELCs; dense infiltrates of lymphocytes and plasma cells; macrophages in periphery.</p> <p><u>CD-3</u>: Large number of T cells diffusely outside calcified areas [4].</p> <p><u>Casp-3</u>: Little tissue outside necrotic areas; less than 5 AP/HPF (aver. 1.7/HPF, three fields evaluated) among ELCs [1].</p> |



|    |        |                                                                                                                                                                                                                                                                                                                                                                                                                                                                                                                             |
|----|--------|-----------------------------------------------------------------------------------------------------------------------------------------------------------------------------------------------------------------------------------------------------------------------------------------------------------------------------------------------------------------------------------------------------------------------------------------------------------------------------------------------------------------------------|
| J6 | Heart  | NHAIR                                                                                                                                                                                                                                                                                                                                                                                                                                                                                                                       |
|    | Lung   | Moderate to marked atelectasis; moderate acute diffuse hyperaemia. NHAIR                                                                                                                                                                                                                                                                                                                                                                                                                                                    |
|    | Liver  | Reduced amount of glycogen in hepatocytes. One small portal aggregate of heterophils. Minimal glycogen depletion.                                                                                                                                                                                                                                                                                                                                                                                                           |
|    | Spleen | Section size approx. 2 x 3 mm); partly broken. Minimally increased numbers of heterophils in loose aggregates in the red pulp. Lymphocyte hyperplasia, minimal.                                                                                                                                                                                                                                                                                                                                                             |
|    | Kidney | NHAIR                                                                                                                                                                                                                                                                                                                                                                                                                                                                                                                       |
|    | LN     | Oval section, approx. 2 mm. Cell-rich, cortex, paracortex, two secondary follicles; no foreign cells.<br>CD-3: Dense population of T cells in paracortex and in interfollicular cortex [3].                                                                                                                                                                                                                                                                                                                                 |
|    | Tumour | Oval section, approx. 3 x 3 mm. Bordered by partly by muscle, mostly by thin fibrous capsule. Large calcified areas and several MGCs, some with lucent bluish-gray material; admixed with foamy ELCs; abundant infiltration of lymphocytes, plasma cells and macrophages; dense infiltrates in the periphery.<br>CD-3: Large number of T cells diffusely and in peripheral infiltrates [3]-[4].<br>Casp-3: Little tissue outside necrotic areas; less than 5 AP/HPF (aver. 3.7/HPF, three fields evaluated) among ELCs [1]. |

|    |        |                                                                                                                                                                                                                                                                                                                                                                                                                                                                                |
|----|--------|--------------------------------------------------------------------------------------------------------------------------------------------------------------------------------------------------------------------------------------------------------------------------------------------------------------------------------------------------------------------------------------------------------------------------------------------------------------------------------|
| J7 | Heart  | NHAIR                                                                                                                                                                                                                                                                                                                                                                                                                                                                          |
|    | Lung   | Moderate to marked atelectasis; moderate acute diffuse hyperaemia. NHAIR                                                                                                                                                                                                                                                                                                                                                                                                       |
|    | Liver  | A haemorrhage and a tear. One small portal lymphocytic infiltrate.                                                                                                                                                                                                                                                                                                                                                                                                             |
|    | Spleen | Section size approx. 1 x 2 mm. NHAIR                                                                                                                                                                                                                                                                                                                                                                                                                                           |
|    | Kidney | NHAIR                                                                                                                                                                                                                                                                                                                                                                                                                                                                          |
|    | LN     | Elongated section, approx. 2 x 1 mm. Cell-rich, medulla; paracortex; cortex, primary follicles; no foreign cells.<br>CD-3: Dense population of T cells in paracortex and in interfollicular cortex [3].                                                                                                                                                                                                                                                                        |
|    | Tumour | Round section, approx. 1 mm. Without natural borders. Aggregates/infiltrates of foamy ELCs (some contain bright yellow granular pigment) admixed with some small calcifications and few MGCs; large number of individual lymphocytes and plasma cells / loose lymphocyte infiltrates and macrophages.<br>CD-3: Large number of T cells individually and in aggregates [3].<br>Casp-3: Small section; less than 5 AP/HPF (aver. 1.3/HPF, four fields evaluated) among ELCs [1]. |



Fig. S1

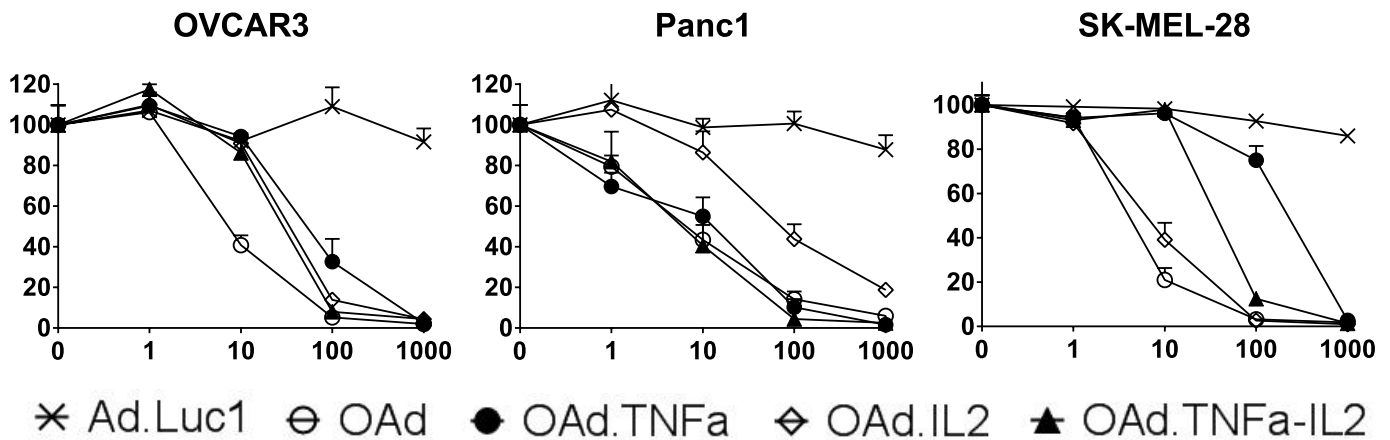

Supplementary Figure S1. Oncolytic activity of the virus in a selection of human cancer cell lines. The viruses showed oncolytic potential in ovarian cancer (OVCAR3), pancreatic cancer (Panc1), and melanoma (SK-MEL-28). The cells were incubated with viruses for four (OVCAR3 and Panc1) or six days (SK-MEL-28). Ad.Luc1 = Replication deficient Ad5/3-Luc1, OAd = Ad5/3-E2F-d24, OAd.TNFa = Ad5/3-E2F-d24-hTNFa, OAd.IL2 = Ad5/3-E2F-d24-hIL2, OAd.TNFa-IL2 = Ad5/3-E2F-d24-hTNFa-IRES-hIL2. Mean plus SD is shown.

Fig. S2

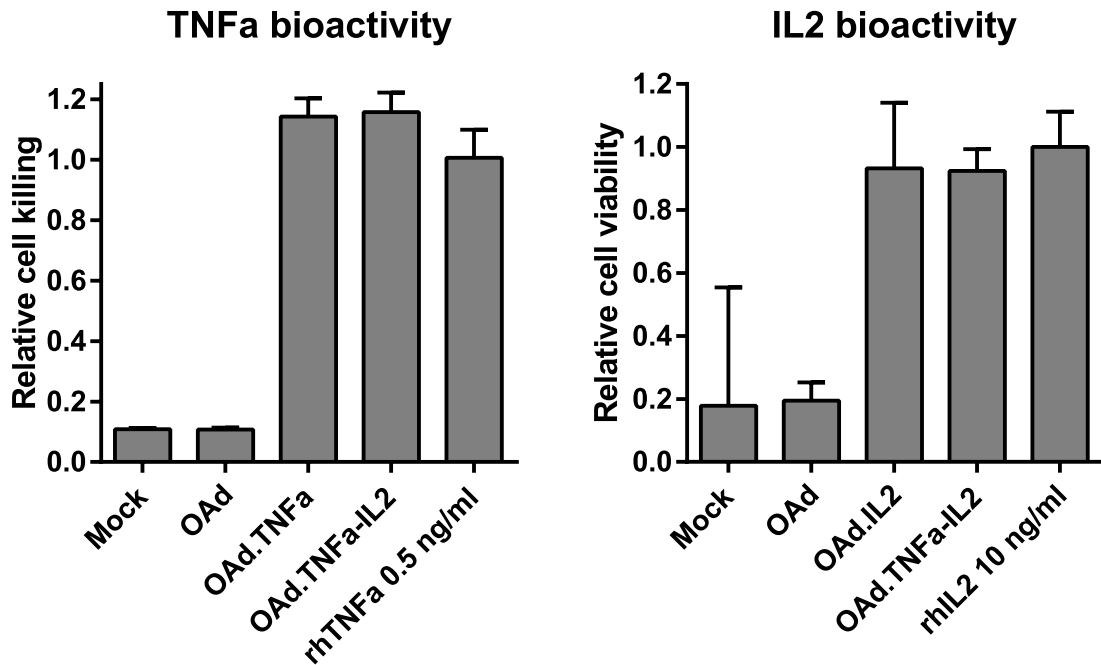

Supplementary Figure S2. Human cell lines produce biologically active cytokines when infected with armed viruses. A549 cells were infected with 1000 VP per cell for 72 hours. The supernatant was filtered and applied on indicator cell lines. TNFa-induced killing of L929 cells or IL-2-induced proliferation of CTLL-2 T cells were studied with MTS. OAd = Ad5/3-E2F-d24, OAd.TNFa = Ad5/3-E2F-d24-hTNFa, OAd.IL2 = Ad5/3-E2F-d24-hIL2, OAd.TNFa-IL2 = Ad5/3-E2F-d24-hTNFa-IRES-hIL2. Mean plus SD is shown.

**Fig. S3**

Draining lymph node

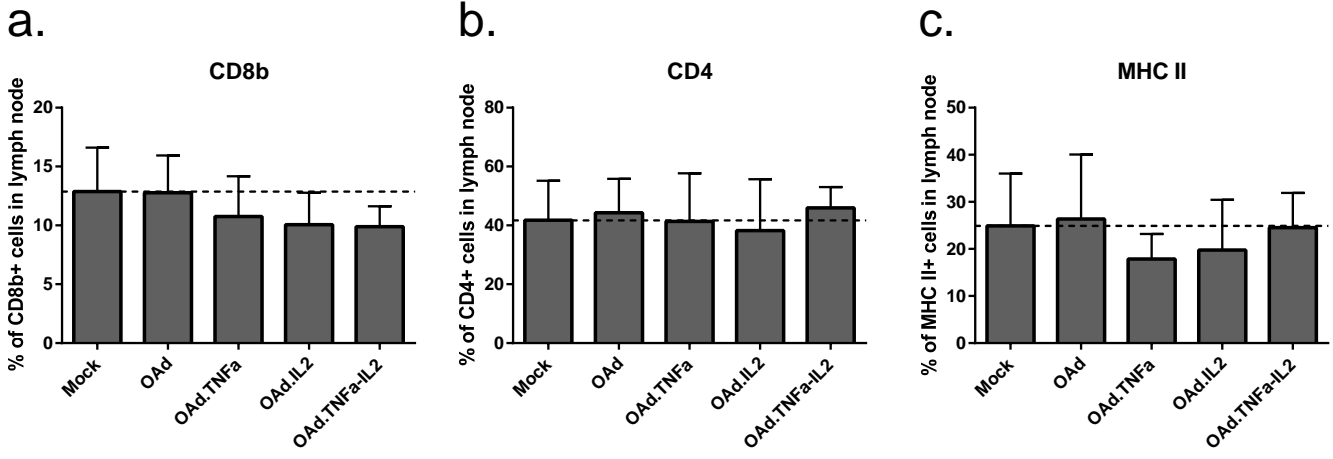

Spleen

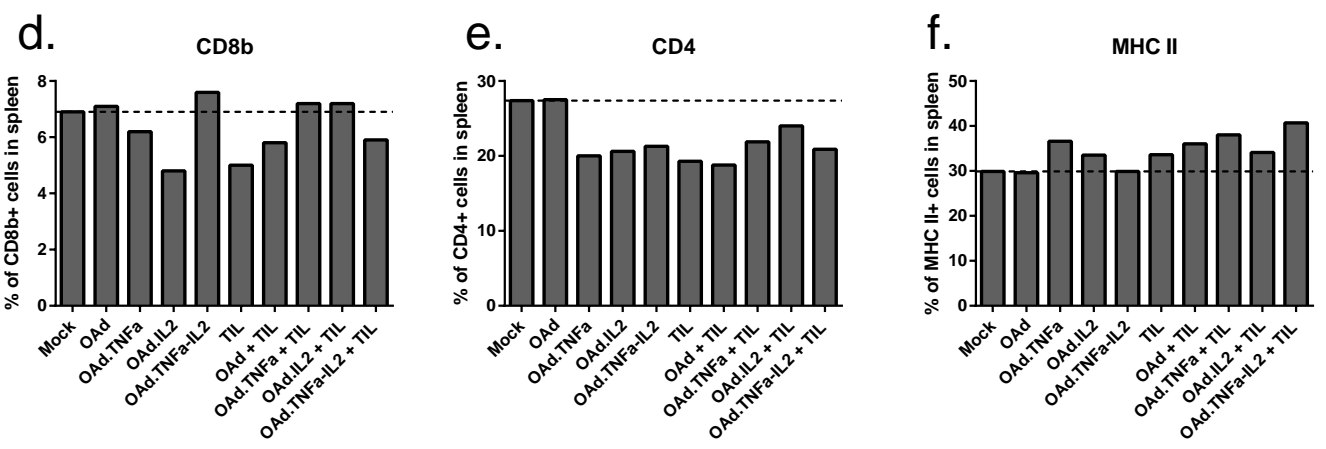

Supplementary Figure S3. Changes in immune cell subsets in tumor-draining lymph nodes and spleens. Percentage of (a) CD8+ (b) CD4+ and (c) MHC II+ cells in lymph nodes and (d–f) in pooled spleens, respectively. OAd = Ad5/3-E2F-d24, OAd.TNFa = Ad5/3-E2F-d24-hTNFa, OAd.IL2 = Ad5/3-E2F-d24-hIL2, OAd.TNFa-IL2 = Ad5/3-E2F-d24-hTNFa-IRES-hIL2. Mean plus SD is shown.
